# Supplementary material for: Survival, Morbidity, Growth and Developmental Delay for Babies Born Preterm in Low and Middle Income Countries – A Systematic Review of Outcomes Measured
Source: PLoS One. 2015 Mar 20;10(3):e0120566. doi: 10.1371/journal.pone.0120566 (PMC4368095; doi:10.1371/journal.pone.0120566)
Supplement: S1 Dataset — (XLS) [file pone.0120566.s001.xls]

## Sheet: Sheet1
	1. 1st author et al (yr)	2. Study setting and population	Country setting	3a. Setting for recruitment	3b. Healthcare package available	4. Type of study	5. Number of babies or children included in study	6. Twins included (Y/N)	7. Period of follow up	8a. Was primary recruitment prem or LBW or other	8b. Method of assessment of prematurity (estimation of gestational age at birth)	9. Gestational age at birth for babies included in the study or if birth weight used rather than gestational age - birthweight cut off for included studies.	10. Mortality measurements used: including Perinatal mortality (PNM), Stillbirth (SB) or Early Neonatal Mortality ( ENM - 1st week after birth) or Late Neonatal Mortality (LNM - up to 28 days after birth)	11. Mortality outcomes assessed	12. Morbidity measures used	13. Morbidity outcomes	14. Growth measures used	15. Growth outcomes	16. Measures of neurodevelopment used	17. Neurodevelopment outcomes	18. CHERG grade: High/Moderate/Low/Very Low
145	Were et al 2006	Newborn Unit of Kenyatta Hospital Cohort of infants <1500g surviving the newborn period	1	3	3	7 (longitudinal descriptive study)	175 started, 120 completed	Not clear	2 years	2 - Birth weight <1500g	6	1000-1500g, mean 32.5 weeks	unclear	45 died during study period	Cerebal palsy defined as 'presence of abnormal muscle tone or power in one or more limbs or the trunk.	All forms found in 14. 18 had spastic palsy	Anthropometric at birth, 28-30 days and on 3 month check ups. National Centre for Health Statistics monograms used to analyse.	Not clear	Development delay determined by Dorothy Egan's Model. Functional disability (physical and cognitive development) determined by Saigal and Rosenbaum's method.	Unclear results	Low
168	Christian, P et al 2014	Rural south plains of Nepal - Nepal Nutrition Intervention Project	1	1	5	2	1927 premature infants eligible	Not clear	Average age 8.4 yrs	1	3	<37 weeks - not clear	No	N/A	No	N/A	Anthropometry (weight, height and mid upper arm circumference)	Head circumference and SGA related to cognitive test results	General intelligence was assessed with the Universal Nonverbal Intelligence Test (UNIT) [13]. A (numbers) Stroop test [14], and backward digit span (Wechsler and Psychological Corporation. 1991) were utilized to assess inhibitory control and verbal working memory, components of executive functioning. The Movement Assessment Battery for Children (MABC) and a finger tapping test were administered t…	SGA was significantly (all p < 0.005) associated with lower UNIT scores (−2.04 SE = 0.39); higher proportion failure on Stroop test (0.06, SE = 0.02); and lower scores on the backward digit span test (−0.16, SE = 0.04), MABC (0.98, SE = 0.25), and finger tapping test (−0.66, SE = 0.22) after adjusting for confounders	Moderate
142	Webb et al 2008	Four prenatal clinics in Dar es Salaam Antenatal cohort of HIV infected women between 12-27 weeks gestation at enrolment	1	2.1	1	1	1078 pregnant women, 886 babies	Unclear includes singletons	24 months	3	6	All	No	N/A	Not related to preterm	N/A	LAZ - length for age. WLZ - weight for length.	For low birth weight and preterm, significantly lower LAZ score, significantly more shunted and wasted than normal weight or normal term	No	N/A	High
83	Lincetto et al 1998	Central Hospital of Maputo All newborns with a birth weight <2kg admitted to hospital and eligible for KMC	1	2.5	3	3	246	Not clear	6 weeks	2	6	<2000g, mean 34.2 weeks (cold) 34.5 weeks (heat)	No	N/A	No - major complications or readmissions dependent on regained birth weight.	No difference in adverse effects	Mean growth/infant/d. Weight at discharge. 6 week check up	Weight at discharge did not effect growth rate when treated with KMC	No	N/A	Low
148	Worku et al 1999	Neonatal unit of Tikur Anbessa Hospital - the only place where sick newborn infants are admitted for intensive neonatal care in Addis Ababa. All LBW infants admitted to the NNU from Sept 1995-Aug 1996.	1	3	3	4	3375	Not clear	To discharge	2 - Babies LBW <1500g	1	All	Mortality rate in hospital	Mortality pattern statistically significantly decreased independently with increase in GA and birth weight. Prematurity related conditions were most common cause of deaths.	No	N/A	No	N/A	No	N/A	Moderate
187	Rylance, S et al 2013	Neonatal unit Queens Hospital Blantyre Malawi	1	3	3	4	1839 admissions	Y	Not clear	2	1	All births - classified as <32 weeks or >32 weeks	Survival to discharge	19 % of those <32 weeks survived to discharge	No	N/A	No	N/A	No	N/A	Low
88	Manji et al 1998	Muhimbili Medical Centre Neonatal Unit Dar es Salaam All infants <2.5kg admitted to the unit or those >2.5 kg with risk factors.	1	3	3	2	784 cases, 612 controls	Not clear	6 weeks	6	2	<2500g	NMR	Association of positive outcome with increasing birth weight or GA. Preterm being one of the commonest causes of death.	Standard criteria for morbidity	LBW 3.5 times higher risk when compared with controls. Preterm 2.8 times higher risk.	No	N/A	No	N/A	Moderate
92	Mlay et al 2000	Seventy bed neonatal unit of Muhimbili Medical Centre - referral and teaching hospital in Dar es Salaam All neonates with RDS less than 8 days old	1	3	3	2	256 study, 256 control	Not clear	Discharge or death	7 - All neonates with RDS	2	All	No. died before discharge due to RDS	52% due to RDS	No - developed RDS	Neonates with RDS were of significantly lower GA and lower birth weight	No	N/A	No	N/A	Low
147	Wolf et al 1998	Special Care Unit of Mpilo Central Hospital, Bulawayo, Zimbabwe Those with a bilirubin >400 micro mol/l.	1	3	7	3	50	Not clear	1 year	7 - Babies with high bilirubin	2	All	No	N/A	Jaundice, icterometer to establish degree	Unclear - those with billirubin levels between 400 and 500 and scored abnormal/suspect were preterm or had haemolytic disease	No	N/A	Bayley Scales of Infant Development	Birth weight and gestational age had no influence	Low
171	Engmann et al 2012	Community setting Ghana - Navrongo Health Research Centre in the Kassena-Nankana District1 (KND) of the Upper East region. The KND covers a land area of 1685 km2 and has an estimated population of 150 000. The district has one major hospital that acts as a referral hospital to 5 health centres	1	1	5	2	18,852 births (10.8% were less than 32 weeks and 22.3% were 32-36 weeks)	Y	7 days	3	3	All (<36 weeks considered prem)	Perinatal mortality rate and early neonatal mortality (1st 7 days)	If <32 weeks PNMR was 186/1000 (OR 13.8 (11.5-16.38) or OR Gee ratio 2.84 (2.12-3.81), if 32-36 weeks then PNMR was 33.7 (OR 2.1 (1.69-2.60) or OR Gee ratio of 2.1 (1.69-2.60) and 1.29 (0.97-1.71) and if term was 16.4. Early neonatal mortality rate was 37.3/1000 for <32 weeks with an OR or 3.16 (2.35-4.22) and an OR Gee ration of 2.84 (2.11-3.81), for those <36 weeks the ENMR was 16.8 with an OR …	No	N/A	No	N/A	No	N/A	Good
196	Welaga, P. et al 2013	Navrongo Health Research Centre Demographic Health System Data	1	1	5	2	17751 live births	Y	1 month	3	3	all but broken up into <32, 32-36, >36	Yes - ENMR, NMR (Verbal autopsy used)	NMR 24/1000 (22-26), ENMR - 16/1000 (14-17). Prem NMR 18/1000 in 2003 and 2/1000 in 2009, OR of death <32 weeks (3.39 (2.66-4.32) Adj OR 3.10 (2.43 - 3.96), <36 weeks - 1.2 (0.95-1.54) OR and Adj OR of 1.1 (0.87-1.42)	No	N/A	No	N/A	No	N/A	Good
48	Engmann et al 2009	12 communities in four districts including hospitals, health centres, home or other Any pregnant woman enrolled	1	1.1	5	3	7959 live births	YES	7 days	5	3	<37 weeks and >37 weeks	Yes - Perinatal mortality rate, early neonatal death rate	PNMR - 64/100 and gest age increased it to 738 per 1000 and or of 71.2, ENMR - 32/100 and in prems 573 per 1000 with or of 68.8	No	N/A	No	N/A	No	N/A	Moderate
1	Abu Habib et al 2011	Referral hospitals from North Eastern Tanzania Singleton births from birth registry	1	2.4	5	4	14,444 singleton births from Tanzania	NO	Not clear	5	3	All	Yes - SBR - proportion of stillbirths of al live and stillbirths. Early neonatal mortality rate calculated as the proportion of deaths to live births during the first week of life. Perinatal mortality rate calculated as the proportion of still births and early neonatal deaths among all live births and still births	Yes - PNMR 41/1000, PNMR much higher in Tanzanian babies but numbers not provided. Only figure 2.	No	N/A	No	N/A	No	N/A	Low
51	Feresu et al 2004	Harare Central Hospital Maternity unit, Zimbabwe (not possible to distinguish fresh and macerated stillbirths to this data set) All births 1 Oct 1997-30 Sept 1998 abstracted from maternity delivery registry records. Eligibility based on WHO definition of viability - birthweight of >500 g and born at >20 week gestation.	1	2.4	7	7 audit	18149	YES	Unclear to discharge?	5	3	20-32 weeks	Still birth and those dying in first hour of life	Risk of still birth 7.3 times higher among preterm compared to term. Preterm more likely to die within first hour of life compared to term.	No	N/A	No	N/A	No	N/A	Low
70	Kambarami et al 2002	Harare Central Hospital Neonatal Unit All neonates admitted to the neonatal unit requiring care Jan-Dec 1998.	1	3	4	3	297	Not clear	12 months	6	3	500-1800g	Number of deaths during hospital and study period	Unacceptably high number of babies died before discharge. Age at discharge, weight (>1500g) at birth and discharge were not significantly associated with infant mortality.	No	N/A	No	N/A	No	N/A	Very Low
9	Ayaya et al 2001	Babies admitted to the Moi Teaching and Referral hospital Eldoret Jan-Dec 1997, Case notes of all admitted (except those who died) were reviewed. Those with adequate information were included in study with many lacking information on antenatal care, details of admission, management of labour.	1	3	7	4	225 case records	YES	Not clear ? Until discharge	3	3	20% prem - Not clear	Yes - not clear - discusses PNM rate as 667 per 1000	N/A - not associated with gest age	RDS, tulips, neonatal sepsis, convulsions, meningitis, apnoea, aspiration, apnoea	Gest age associated with RDS p-0.001	No	N/A	No	N/A	Low
167	Chiabi et al 2013	Neonatology Unit of the Yaounde Gynaeco-Obstetric and Paediatric Hospital	1	7	7	4	1894 premature infants	Yes	To discharge	1	3	<37 weeks (Mean - 36 weeks)	Yes - mortality on discharge, "early neonatal mortality (0-7 days)" mentioned	67% of premature infants admitted died (not sure if this is a percentage of all deaths - not clear from write up)	No	N/A	No	N/A	No	N/A	Low
137	van den Broek et al 2005	Namitambo or Thylo Malawi Women attending for antenatal care	1	1.1	2	2	512 women	YES	6 weeks	3	4	24-37 weeks	Perinatal mortality	Babies born <37 weeks more likely to die within first 24 hours than babies born at term. Babies born before 37 completed weeks but after 32 weeks were twice as likely to die as babies born at term but not statically significant. For those born before 33 and after 24 wks, there was a highly significant increase in perinatal mortality of 75%.	No	N/A	No	N/A	No	N/A	Moderate
125	Schmiegelow et al 2012	Korongwe District Reproductive and Child Health Clinic Gest ages <24 weeks, living in accessible area on Korogwe and willing to give birth at Karogwe.	1	1.1	5	2	872 mothers	YES	Not clear	5	4	All - prem <37 weeks	Yes - PNM defined as a stillbirth after 28 weeks of pregnancy or death within the first week of life. Assigned to seven functional categories using a modified version of the system from Hinderaker et al	Preterm delivery OOR of 14.47 CI 3.23-64.8. PNMR 52/1000 overall	No	N/A	No	N/A	No	N/A	Moderate
101	Osman et al 2001	Two suburban antenatal clinics in Mozambique in Maputo Consecutively enrolled women	1	2.1	5	3	908 women	NO	7 days postpartum	3	4	Not clear	Perinatal mortality rate	OR of 8.48 of perinatal mortality with prematurity	No	N/S	No	N/A	No	N/A	Moderate
193	Slyker et al 2014	Antenatal clinics in Nairobi, Kenya	1	1	5	2	468 singleton deliveries	N	1 year	3	5	Mean gestation was 35 weeks.	Neonatal and infant mortality were defined as deaths occurring within the first 28 days, and 365 days of life, respectively	neonatal mortality. When adjusting for maternal plasma HIV-1 RNA load at 32 weeks gestation, PTB (hazard ratio (HR) = 2.7, p = 0.05), LBW (HR = 3.3, p = 0.03) and SGA (HR = 2.9, p = 0.04) remained independently associated with time to infant death incidence rate (IR) for infants born PTB was 7-fold higher than infants born at term (IR = 5.8 vs 0.81 per 1000 person-days, incidence rate ratio (IRR)…	No	M/A	No	N./A	No	N/A	Good
144	Were et al 2007	Newborn Unit of Kenyatta Hospital 344 infants weighing 1500g or less admitted to the newborn unit during the year 2002, 185 survived the newborn period - 175 actually recruited for follow but by the time the study was concluded, 10 defaulted and 45 died.	1	3	3	2	344 - 185 survived newborn period. 175 in study.	Not clear	2 years	2 - All surviving LBW neonates	5	<1500g (Ballard and LMP)	Infant mortality rate	No significant difference between those fed pre-term milk compared to breast milk.	Re-hospitalisation rate	More on breast milk were rehospitalised than those preterm	No	N/A	Saigal and Rosenbaum used	Breast milk infants had more neurological disabilities than pre-term milk.	Moderate
111	Poudel et al 2009	BP Koirala Institute of Health Sciences - tertiary care centre and medical college in Eastern Nepal All VLBW infants were identified by reviewing the admission registry. Cases admitted between 13 Apr 2005-12 April 2008.	1	3	4	4	1135	YES	Hospital stay	2	5	<28 weeks, 28-32 weeks,>32 weeks (Ballard and LMP)	Neonatal mortality rate	Survival amongst VLBW increased with GA. Mortality decreased with GA increase significantly.	No	N/A	No	N/A	No	N/A	Low
42	Darmstadt et al 2008	Special care nursery in Dhaka Shishu Hospital in Bangladesh - admits term or preterm newborn infants and primarily serves an urban poor population. No maternity ward in hospital therefore all patients born at other hospitals or at home. All infants <33 wks gest and <72 hours old.	1	3	7	1	497 term and preterm	YES	28 days	1	5	<33 weeks Ballard and (No Suggestions) and LMP	Neonatal mortality (survival rates) at 3, 7, 10, 14, 21 and 28 days	Mortality lowest in the aquaphore group. In control group survival rates 29.4%. Overall mortality rate 64%.	RDS, apnoea, birth asphyxia, jaundice	Serious morbidities associated with death identified, apnoea, RDS and jaundice all significantly associated with death.	No	N/A	No	N/A	High
157	Ades V 2013	Village in Uganda, 77% of deliveries in hospital but some outside hospital in community	1	6	5	1	342 HIV infected women and 351 live born infants	y	28 days	3	5	All gest ages - median gest age 38.9	Yes - PNM at 7 days and NMR at 28 days	If born preterm, unadjusted OR of 12.7 (3.8 - 42.7). No adjusted OR. 7 out of 13 infants who died in the first 28 days were prem (<32 wks.). Increased GA was associated with decreased OR of death 0.45 (0.2-0.9)	No	N/a	No	N/A	No	N/A	Good
127	Servili et al 2010	Demographic surveillance site at Butajira - predominantly rural area of Ethiopia 130 km south of Addis Ababa Infants who were weighed at birth from a nested population based cohort of pregnant women	1	1.2	1	3	194	Not clear	12 months	5	6	All	No	N/A	No	N/A	No	N/A	Bayley Scales of Infant Development II	Lower infant weight for age associated with significantly lower scores	Low
149	Worku et al 2004	Neonatal unit of Tikur Anbessa Hospital - only place where sick newborn infants are admitted for intensive neonatal care in Addis Ababa. All premature (low birth weight <2000g) neonates delivered in hospital or referred from elsewhere and admitted over a one year period.	1	3	3	2	298	Not clear	Discharge or death	2 - By <2000g in one year	6	<36 weeks, <2000g	Deaths due to Intra-ventricular haemorrhage recorded	Trend of decreasing IVH as gestational age and birth weight increased although not significantly significant	No	N/A	No	N/A	No	N/A	Moderate
73	Khan et al 2006	Preterm infants born as part of a study looking at topical emollient therapy during Dec 1998-Jul 2003. Preterm infants in SCBU of Dhaka Shishu hospital during 1998-2003 who were included in trial.	1	3	7	3	159	YES	31 months	1	6	<33 weeks	No	N/A	No	N/A	No	N/A	Examined for neurodevelopmental impairments and disabilities. Bayley Scales of Infant Development II. Standford-Binet Intelligence Scales. Behaviour rating scale.	Significant proportion of preterm newborn infants at risk for a range of neurodevelopmental impairments.	Low
74	Khan et al 2008	Dhaka Shishu Hospital Infants born <33 weeks admitted within 72 hrs of delivery.	1	3	7	3	159	Not clear	Up to 30 months (average 22 months)	1	6	<33 weeks	Duration of study	24 died	No	N/A	No	N/A	Neurodevelopment - looking at gross motor, fine motor, vision, hearing, speech, cognition, behaviour and seizures. Used Bayley Scales of Infant Development II	Normal n=24, One or more NDI =64	Low
97	Ndaboin et al 2012	Department of Obstetrics and Gynaecology at BMC, Mwanza Tanzania All pregnant women admitted to BMC for delivery. Eclamptic women were identified during the hospitalisation and all data were collected from the patient or patients relatives after informed consent.	1	3	7	3	82 delivered babies	YES	Not clear	7 - Babies of preeclamptic mothers	6	Not clear - all	Yes - perinatal mortality but not specific 207/1000 and the majority were preterm	PNMR - 207/1000. majority were preterm	No	N/A	No	N/A	No	N/A	Low
69	Kambarami et al 2003	Harare Hospital Maternity Unit All preterm infants born in the Maternity Unit weighing 500-1800g	1	3	4	4	5397	Not clear	Discharge or death	2	6	>500g	Number of deaths	Odds of dying significantly higher if infant had low birth weight and if reason for admission was prematurity	No	N/A	No	N/A	No	N/A	Low
104	Pambou et al 2006	Gynecology and obstetric service in Brazzaville. All deliveries <37 weeks in 1 year	1	3	7	4	5109 - 852 preterm	YES	To discharge?	1	9	All (Ballard and USS)	24 hour survival rate	28-30 weeks were 40.7% of deaths	Rates of those needed to be transferred to NICU	Most common amongst those less than 33 weeks	No	N/A	No	N/A	Low
79	Kulmala et al 2000	Southern Malawi rural zone All pregnant women presenting for antenatal care at Lungwena Health Centre	1	1.1	1	3	813	YES	Neonatal period	5	10	All	Peri and Neonatal Mortality	Preterm birth bore strongest association with death. Preterm only statistically significant independent predictor of neonatal mortality	No	N/A	No	N/A	No	N/A	Low
136	Vaahtera et al 2000	Rural area of Malawi - community settings All pregnant women presenting for antenatal care at lungwena health centre between Jun 1995-Aug 1996.	1	1.1	2	3	733 infants (142 <38 wks)	YES	1 year	3	10	Not clear (<38 weeks)	Mortality rate in first year (Infant mortality rate) Mentions neonatal mortality - in first month but doesn't make it clear of rate, only that 25% of the deaths were in the first month	infant mortality rate of 136/1000 and neonatal mortality was 25% of 136 in 1st month	No - not in this paper but in others	N/A	Not in this paper but in study	N/A	No	N/A	Moderate
128	Sloan et al 2007	42 unions in Bangladesh Women aged 12-50 years who were pregnant at time of study	1	1.2	1	1	41,325 2129 control group 160 Still births.	YES	Newborns: 30-45 days Infants: 1 year	3	2	2359 confirmed <1500g. 3869<33 weeks	Duration of study, categorised by group and LBW.	Nearly same in control and KMC group. No significant difference amongst LBW.	Measured at 30-45day follow up	Fewer CKMC became pale.	Weight measured and arm/head circumference.	No Difference	No	N/A	High
60	Gladstone et al 2011	Four community settings in Malawi. All neonates surviving to 6 weeks <37 wks gest	1	1.1	1	2	840 preterm and term	YES	2 years	1	4	28-37 weeks	Yes - Post neonatal mortality (verbal autopsy)	Increased risk of death in prem babies or 1.79 hazard ratio	Yes - attendance at clinic, admission to hospital, seizures	Similar rates of attendance at clinic and admissions	Yes - MUAC, OFC, height, weight,	Higher % of preterm babies who were malnourished at 2 years	Yes - Malawi Developmental Assessment Tool, 10 QQ	More likely to have risk of developmental delay if premature	Moderate
183	McDonald CM et al 2012	8 antenatal clinics in Dar Es Salaam	1	1	5	1	2387 infants	N	24 months	3 (infants of HIV positive mums)	6	All infants. Not clear of average	No	N.a	Yes - morbidity assessment, which was supported by a pictorial diary that mothers were asked to complete at home to record when their child had certain symptoms. Diarrhoea was defined as the presence of three or more loose or watery stools in the prior 24 h. Body temperature, measured using a digital thermometer to the nearest 0.1 1C, and respiratory rate, measured for 1 min using a stopwatch, we…	N/a	Yes - OFC, stunting, wasting	HR (risk of stunting on uni variate analysis was 1.26 (1.02, 1.56), HR risk of wasting 1.37 (1.13, 1.67) on univariate analysis and 1.28 (1.05, 1.57) on multivariate analysis and underweight 1.42 (1.15, 1.75) for univariate and 1.30 (1.05, 1.61) for multivariate.	No	N/A	Good
150	Wu et al 2012	Sarhlahi District South Nepal Oct 2002-Jan 2006 Children in newborn washing trial cluster randomised to one of six groups that comprised the treatment assignments for two concurrent nested community based trials of the impact of newborn skin and umbilical cord cleansing on cord infection and mortality.	1	1.2	5	4	680	Not clear	2-5 years from birth	7	3	All	No	N/A	No	N/A	Yes - WAZ, HAZ, WHZ, BMI	Not related to prematurity	Yes - TQQ +	Children who were preterm had an adjusted odds ratio of a positive disability screen of 1.3 compared to term. Varied from 1.25 for LD to 1.83 for behavioural problems.	Low
143	Were et al 2006		1	3	3	3	175 infants recruited by VLBW	Not clear	Until discharge	2	3	Average 32 weeks	No	N/A	Yes - % neonatal illness (significant)	62% had neonatal significant illnesses - significantly less if given formula	Yes - weight g/kg/day, length, (cm/wk), OFC (cm/wk) and catch up at term (40 weeks)	Only 20-28% had reached expected 3rd centile weight, length and OFC by term. Therefore, growth faltering and better growth with preterm formula.	No	N/A	Low
95	Muhudhia et al 1989	Kenyatta National Hospital Any infant weighing between 1001-1750g and fulfilling criteria of being a singleton with normal vaginal delivery and Apgar score above 5 at 5 mins who was AGA by dates and assessment.	1	3	3	3	64 preterm infants	NO	90 days	2	6	Not clear - 28-32 weeks?	No	N/A	No	N/A	Yes - weight weekly	Birth weights were regained. Those with lowest birth weight 1001-1250g had fastest catch up growth	No	N/A	Low
116	Rosenberg et al 2008	Special care nursery in Dhaka Shishu Children's Hospital and Kasr El Ainia Hospital - tertiary care centre in Cairo Egypt and community setting in Nepal Gestational age <33 weeks or <34 weeks and chronological age <72 hours	1	3	7 (tertiary care facility)	7 (Retrospective analysis)		Not clear	Variable depending on study	1	5	<33 weeks	Mortality risk	SAW (simplified age weight classification) is a markedly simplified mortality risk prediction score for use in identifying high risk very low birth weight neonates in developing country settings.							Low
176	Krishnamurthy et al 2013	Tertiary care centre in Pondicherry, India	2	7	7	1	104 infants	N	12 weeks postnatal age	1 (and other inclusion criteria)	6	<37 weeks (34 weeks gestation was average)	No	N/A	serum ferritin, ROP (indirect ophthalmoscopy), NEC (modified Bell's criteria), PVL (USS deVries classification), sepsis (clinical signs of infection and either a positive blood culture result or hs-CRP level >10 mg/L), Hb levels and incidence of transfusion	Serum ferritin level was significantly higher (p<0.001) at 12 weeks (82±5 vs 63±3 ng/mL) in the EI group. Haemoglobin (10.1±0.4 vs 9.2±0.4 g/dL) and mean corpuscular haemoglobin concentration (31±0.5 vs 29.4±0.5 g/dL) were also significantly (p<0.001) higher at 12 weeks in the EI group. There was a significant decrease of ferritin in the LI group and significant increase in ferritin in the EI gro…	"Anthropometric parameters"	Same at end of study	Neurological assessment (Hammersmith neurological assessment)	No differences at end of study	Good
179	Lakshmi, C. et al 2013	Referral Perinatal centre in India	2	7	7	3	238 infants	Y	18 months of age	4	4	<37 weeks but mean of 31 weeks	Hospital deaths	12 with absent or reduced diastolic flow died vs 1 of others. after adjusting for ELBW (birth weight<1000g) and IUGR status, AREDF continued to have an independent association with neonatal mortality (OR 9.8, 95% CI 2.1- 46.4) and RDS (OR 2.4, 95% CI,1.1-5.0).	RDS, resp support, PDA, jaundice, CLD, ROP	Increased risk of RDS and resp support in ARDEF	Growth was evaluated by measuring the weight, head circumference and length by a trained nurse and plotted on the Indian Academy of Pediatrics growth charts	There were also no differences between the groups in the incidence of microcephaly, short stature or poor weight gain.	Neurological assessment was done by experienced physicians using the Amiel-Tison method, BSEAs also done at 40 weeks	combined outcome of death or cerebral palsy (n=18,17% vs n=4, 3%, OR 5.9, 95% CI 1.9 to 25) was 5.9 times higher in the AREDF group compared to the FEDF. Also AREDF infants showed a trend toward higher risk for developing cerebral palsy compared to the FEDF infants (n=6,7% vs n=1,1%: P=0.06). None of the infants in either group were blind or had deafness. independent association with the composit…	Moderate
38	Cheung et al 2000	Four different areas of Lahore, Pakistan. A typical village, a peri-urban slum on the periphery of Lahore, a typical urban slum area and an upper middle class group. Infants born in four areas of Lahore between 1984 and 1987	2	1.2	5	3	1476	Not clear	3 years?	5	5	All (56% 2,3)	No	N/A	Occurrence of diarrhoea	N/A	Length and thickness changes	Strongly correlated with postnatal wasting, and postnatal stunting.	Denver Development Screening Test as an indicator of gross motor development. Development Screening Inventory.	Thinness at birth and postnatal stunting wand wasting had liner, inverse association with gross and fine motor development.	Low
22	Boo et al 1992	Maternity Hospital, Kuala Lampur All VLBW <1500g infants between 1989-Apr 1990.	2	3	7	4	33,241 or which 329 LBW	YES	To discharge?	2	1	<1500g (95.7% preterm)	Deaths and causes recorded	LBW significantly more deaths. Significantly higher mortality <33 weeks, no significant difference in 33 to 34 weeks and >34 weeks	Criteria followed to diagnose, RDS, intraventricular haemorrhage, septicaemia, necrotising entercolitis, bronchopulmonary dysplasia, congenital syphilis.	Most common, RDS, septicaemia, intraventricular haemorrhage	No	N/A	No	N/A	Low
33	Chaudhari et al 1994	Level II Care Neonatal unit of KEM Hospital, Pune. Preterm infants <37 wks from Jan 1991-Jul 1992.	2	3	3	3	218 prem neonates had USS	Not clear	1 year	1	2	<28-36 weeks	No	N/A	Yes - IVH through USS	26.5% had IVH	No	N/A	Yes - Bayley Scales of Infant Development (Indian Norms)	Specificity of USS at term for predicting outcome was 89%.	Moderate
55	George et al 2009	Kaniyambadi - rural population of 112,000 in 80 villages of Tamil Nadu, South India. Has CHAD programme of community health and development. All pregnancies, deliveries, births, deaths, morbidity, marriages and immunisation. All births in Kaniyambadi from 1986-2005.	2	1.1	5	2	49,806 births	YES	Weekly	5	3	Not clear	Yes - PMR and ENMR	38.6 PNMR overall. Gestational age specific birth and perinatal death rates much higher in India than in Nova Scotia from 28 wks onwards.	No	N/A	No	N/A	No	N/A	Moderate
134	SUMMIT group 2008	Lombok, Indonesia - rural areas Any pregnant woman enrolled in certain time period	2	1.2	1	1	14,053 and 14,373 live births in the 2 groups	YES	12 weeks	3	3	28-36 weeks, 37-42 and >42 weeks	Yes - early infant mortality (up to 12 wks), also looked at overall foetal loss, abortions, still births, PNM and early infant mortality, neonatal mortality, early neonatal mortality, late neonatal mortality and post neonatal mortality	Significantly increased proportion of infants surviving with multiple micronutrients vs just iron and foci acid. Preterm mortality rate in IFA group 58.7 per 1000 vs 50.4 in the MMN group	No	N/A	No	N/A	No	N/A	High
100	Olusanya et al 2012	Island Maternity Hospital, Lagos Nigeria All surviving live births from May 2005-Dec 2007 eligible for recruitment (24 hours after birth)	2	2.5	7	4	4176 infants with 731 late preterm.	Not clear	Not clear	5	3	24-46 weeks	No	N/A	Yes- Apgar score, sepsis, hyperbilirubinaemia, admission to SCBU, mode of feeding	Late preterm significantly more likely to have low Apgar scores, sepsis, hyperbilirubinaemia, admission in sCBU and non exclusive breast feeding	no	N/A	No	N/A	Moderate
21	Bhutta et al 1997	Agha Khan University hospital in Karachi (population 11 million). Tertiary hospital 200 infants with RDS	2	3	4	3	200 infants with RDS (30% of all infants admitted in the time period of Jan 1987-Dec 1993)	Not clear	At least 12 months	7	4	All	Mortality rate	Gestational age significantly lower for those who did not survive and also those born outside, higher mortality in those who had birth asphyxia, low apgar scores, IVH, acute renal failure and pneumothorax.	Yes	Asphyxia, apgars, admission oxygen, PDA, IVH, ARF, sepsis, NEC, max Fi02, maximum PUP, max vent rate, pneumothrax and length of stay but not particularly for prems	No	N/A	No	N/A	Low
181	Leadford, A. E. et al 2013	University teaching hospital in Lusaka, Zambia	2	2	4	1	104 infants	Not clear	1 hour after birth	4	5	26-36 weeks	Mortality prior to discharge	No differences	hypotension, hypoglycemia, seizures during the first 24 hours after birth, respiratory distress syndrome, bronchopulmonary dysplasia, pneumothorax, sepsis, major brain injury (defined as intraventricular hemorrhage Grade 3 or 4 or periventricular leukomalacia), necrotizing enterocolitis, bowel perforation, pulmonary hemorrhage	Of the 49 infants in the intervention (plastic bag) group,29 (59%)compared with 18 (33%) of 55 infants in the control group had a temperature in the normal range at 1 hour after birth (relative risk 1.81 with 95% confidence interval 1.16– 2.81, P = .007). The mean temperature at 1 hour for infants in the intervention group was 36.560.5oC compared with 36.1 6 0.6oC in control infants (P , .001). T…	No	N/A	No	N/A	Good
180	Lavanya, K. R. et al 2012	Urban perinatal centre, Hyderabad, India	2	2	7	3	216 infants enrolled	Not clear	14 days of life or onset of jaundice	1	5	34- 36+6 weeks	No	N/A	Transcutaneous bilirubin (TcB) was measured in each infant twice daily for the first 48 hours of life. Significant jaundice was defined as requirement of phototherapy/exchange.	36% of the jaundiced infants had TSB greater than 15 mg/dL. The mean duration of onset of significant jaundice was 61 ± 32 hours. The mean duration of phototherapy was 49 ± 26 hours. Large for gestation, lower gestational age, birth trauma and previous sibling with jaundice predicted severe jaundice. TcB measured at 24-48 hrs was a better predictor of ‘significant jaundice with onset after 48 hrs…	No	N/A	No	N/A	Moderate
139	Verma et al 1994	Christian Medical Cleege Ludhiana 50 preterm babies born at Christian Medical College	2	2.5	5	3	50	Not clear	6 months and 1 year	1	5	28-36 weeks LMP and confirmed by Dubowitz	No	N/A	No	N/A	No	N/A	Visual acuity, visual axis and ocular movements, retinsocopy	At 6 months no infants had normal vision with hypermetropia seen in 66.6% of 31-33 weeks and 70% of 34-36 weeks group . Anisometropia seen in 26% of total infants. At one year of age number of babies with normal vision increased among all gestational groups except for 28 weeks. Myopia in 16% with an inverse relationship for gestation. Anisometropia had a similar trend.	Low
163	Bucens, I.	East Timor neonatal patient registers 2008-2010.	2	3	3	4	2288 infants admitted	Y	To discharge	3	5	All infants	Yes - deaths in neonates at any time	28.5 % of the deaths were due to prematurity (11% of all cases admitted) with a case fatality rate of 30.6. Unadjusted OR of death in prems 5.64 (3.87-8.20) p,0.000, Adjusted OR = 0.95 (0.39-2.29) p=0.81.	Yes	Not specific for prematurity but measured RDS, asphyxia, jaundice based on a thematic analysis of the commonly indicated diagnoses, one of only seven discharge diagnoses were allocated by IKB to each child. These were asphyxia, infection, jaundice, prematurity, congenital, respira- tory disease and ‘other	No	N/A	No	N/A	Low
114	Rastogi et al 2008	NICU in India All preterm babies <32 wks between Oct 2005-Jun 2006	2	3	4	3	86	Not clear	Hospital stay	1	5	<32 weeks - (3,4,1)	Comparing CRIB II score with actual mortality.	No significant difference between expected and observed - survival depends primarily on condition of baby at birth rather than the intervention used	No	N/A	No	N/A	No	N/A	Low
41	Darmstadt et al 2004	Kasr El-Aini neonatal intensive care unit at Cairo University - free government subsidised unit that admits 600 neonates annually approximately 1/2 who are <34 weeks gest. All infants admitted <34 wks and <72 hours.	2	3	7	1	52 controls 51 study group	Not clear	Hospital stay	1	5	<34 weeks (LMP and Ballard and Dubowitz)	Death due to sepsis determined by physicians	No significant difference between control and study	Blood, CSF and skin condition score to see if sepsis	Incidence of nosocomial infections significantly reduced in treated groups	No	N/A	No	N/A	High
71	Kapoor et al 1995	Urban slum of Lucknow where Integrated Child Development Services were available. Registered population of 25,901 in 25 Anganwadi centres. All births (live and still) from 1 Jul 1992-31 Mar 1993 were included. Retrospective data also from 1 Jan 1992-30 June 1992.	2	1.1	1	3 and 4	966	YES	Not clear	5	6	All	Perinatal mortality rate	Higher in preterm. Prematurity second most common cause of death	No	N/A	No	N/A	No	N/A	Low
62	Graner et al 2010	FilaBavi Demographic Surveillance Site in Bavi District rural 60km north of central Hanoi. 25% of population were randomly selected. All reported births in FilaBavi DSS database from Jan 1999-Dec 2005.	2	1.1	5	3	5521 births	YES	First week of life	5	6	Not clear	Neonatal mortality, Perinatal mortality (intrauterine death >24 weeks or within first 7 days) Early neonatal death - 1st 7 days	Perinatal mortality 25 per 1000 and neonatal mortality 11.6 per 1000.	Not done	Not measured	No	N/A	No	N/A	Moderate
14	Bang et al 2001	Gadchiroli District All children born in 39 villages where field trial occurring.	2	1.2	5	1	763 neonates	YES	28 days	3	6	<37 weeks	Yes - deaths in neonates	If <37 wks, 33% deaths but unclear about stillbirths vs prems	Not for prems in particular	N/A	No	N/A	No	N/A	Moderate
124	Schieber et al 1994	Quetzaltenango - a rural department in the Guatemalan highlands - (all perineonatal deaths) Random sample of all peri-neonatal deaths (from 20wk of pregnancy through to 28th day after birth) recorded in civil registry between Aug 1988-July 1989. Controls were the next registered birth after the study case in which the infant lived at least 28 days.	2	1.2	5	2	120 cases 120 controls	Not clear	28 days	5	6	All	Perinatal mortality rate	Prematurity had significant impact on perinatal mortality rate	No	N/A	No	N/A	No	N/A	Moderate
123	Sarna et al 1990	Neonatal division of Lady Harding Medical College - both booked and unbooked mothers as well as high risk cases referred to from periphery are admitted. Live births and neonatal deaths between Jul 1998-Dec 1998	2	2.4	7	4	7309	Not clear	Not clear	5	6	All	NMR proportional mortality rate and idealized mortality rate.	Mortality increased significantly if BW <2kg and if gestation <37 weeks	No	N/A	No	N/A	No	N/A	Low
86	Malhota et al 1994	Nehru Hospital in Chandigarh - Level III Nursery (SB excluded) Maternal and neonatal charts of all singleton preterm breech (28-36 weeks) deliveries from Jan 1988-Dec 1991 were reviewed.	2	2.5	4	4	224	YES	Not clear	1 - and breech	6	28-32 weeks - Assessed by physician at birth - method not clear	No	N/A	Morbidity defined as; asphyxia, RDS, need for ventilation, infection, intracranial and pulmonary haemorrhage, hypoxic ischemic encephalopathy, birth injury, jaundice and congenital malformation.	No significant difference between those born vaginally or those born using caesarean	No	N/A	No	N/A	Low
6	Ajayi et al 2003	University of Ilorin Teaching Hospital. Only NNU in 50km2 - "most prem babies who survive the immediate post partum period and invariably transported over long distances to UITH" 196 neonates <1500g at birth admitted between Jan 1992-Apr 1994. 103 were not scanned because 73 of them died within 72 hours or there were logistical problems leaving 93 babies in the study).	2	3	3	3	196 (73 died before scan)	Not clear	2-16 days	5 - All babies born in hospital	6	<1500g	No	N/A	Transfontanelle ultrasound measurements for diagnosis of IVH and PVL.	No significant association between findings and GA and birth weight. Significant association between abnormal scans and Apgar score of </=3 at 1min.	No	N/A	No	N/A	Low
32	Chaudhari at al 1999	All live born infants who weighed <2000g who were eligible for KMC and whose mother would comply with follow up.	2	3	3	2	248 LBW, 89 controls (Assessed 216 LBW and 71 controls at 6 years)	Not clear	6 years	2	6	<2000g	No	N/A	No	N/A	No	N/A	Yes - 1. Stanford Binet Intelligent scales 2. Bender Gestalt Test 3. Human figure drawing 4. OT assessment (Ayres and Bobath) 5. Hearing and ophthalmic assessment 6. Social and environmental assessment. School progress report.	1: Lower than controls but within normal limits (preterm and SGA lowest). 2: significantly worse visomotor perception in LBW. 3: No significant difference. 4: LBW significant problems with preschool skills. The rest were unclear.	Moderate
34	Chaudhari et al 1996	Level II Care Neonatal unit of KEM Hospital, Pune. <37 wks, <2000g, Birth asphyxia , Septicaemia or meningitis, hyperbilirubinemia (serum bili > 12mg/dl in prems or >15 mg/dl in terms, apnoeic, seizures, IVS on USS, RDS. Given a HIGH RISK card on discharge.	2	3	3	3	425 infants enrolled (drop out rate 9%)	Not clear	3 years	7 - High risk infants	6	All (<37 weeks, 2000g risk factors for selection)	No	N/A	Assessment in high risk clinic. Hearing and ophthalmological assessment	Cerebral palsy higher in preterm than general population. No other significant results	No	N/A	Combined Amiel Tison Methods and Occupational Therapists Method. Bayley Scales of Infant Development II. Raval's Scale of Social Maturity.	Unclear results related to preterm.	Low
36	Chaudhari et al 2003	Level II Care Neonatal unit of KEM Hospital, Pune. Infants born in 4 areas of Lahore between 1984 and 1987. Infants <2000g discharged from the NSCU between Oct 1987 and Apr 1989.	2	3	3	2	201, 180 completed study 90 control	Not clear	12 years	2	6	<2000g	Not clear	1 child died due to gastroenteritis	No	N/A	No	N/A	Wechsler's intelligence scale (WISC-R), Bender Gestalt Test (BG) Wide-range Achievement Test (WRAT) Draw-a-person Screening Procedure for Emotional Disturbance (DAP-SPED) Movement Assessment Battery for Children (ABC) School performance.	WISC-R: 37.7% below normal intelligence of which 24.4% borderline intelligence compared to control 18.9%.BG: 46.6% viso-motor age <9yrs compared to control 30%. WRAT: 18.3% poor writing skills compared to control 6.7%. DAP-SPED: No significant difference between groups. ABC: Significant difference control outperforming study group. School performance: Study group was poor compared to control grou…	Moderate
99	Olusanya 2009	Inner city teaching maternity hospital in Lagos, Nigeria Every surviving VLBW singleton infant born	2	3	3	2	40 cases, 200 controls	NO	Not clear	2	6	<1500g	No	N/A	Two-stage hearing screening protocol	VLBW significantly associated with failed or incomplete hearing screening outcomes	No	N/A	No	N/A	Low
5	Aijaz et al 2012	Patients admitted to NICU of Kharadar General Hospital for 2 years All inborn and outborn babies of 6 hours of age with all diseases with or without congenital anomalies	2	3	4	4	1069	Not clear	Until discharge	6	6	Not clear	Yes - "percentage expired"	13.8% expired with most due to sepsis 31.75%	Yes - diseases seen, RDS, birth asphyxia, meconium aspiration, neonatal jaundice, pneumonias, hyaline membrane disease, congenital malformations	Percentages found.. Commonest disease RDS 18.9%, 17% asphyxia etc	No	N/A	No	N/A	Low
20	Bhutta et al 1997 (RDS in Karachi)	Agha Khan University Hospital in Karachi (population 11 million). Tertiary hospital All births at the Aga Khan University Hospital between Jan 1987-1993, those with RDS then reviewed.	2	3	4	3	599 admissions to NICU due to respiratory distress with 127 having RDS out of 10,134	Not clear	To discharge?	7	6	All	Mortality rate	Highest amongst babies </= 1000g	No - diagnosed with RDS	No significant trend of prevalence of RDS among LBW	No	N/A	No	N/A	Low
80	Kumar et al 2011	Division of Neonatalogy, All India Institute of Medical Sciences All ROP screening forms for all infants undergoing screening from Jan 2003-Dec 2008. All preterms <32 weeks or <1500g or if <1800 or 33-34 weeks if additional risk factors.	2	3	4	4	704	Not clear	Hospital rope screening	7 - All babies meeting ROP screening criteria	6	<34 weeks	No	N/A	ROP	11.9% ROPand 4.7% severe ROP	No	N/A	No	N/A	Moderate
132	Tagare et al 2009	KEM Hospital, Pune India - 40 bed tertiary care unit Preterm neonates <37 weeks within first twelve hours of life	2	3	4	1	140	YES	To discharge?	1 - Prem	6	<37 weeks	No	N/A	Screened for sepsis	No evidence that routine antibiotic use has a positive effect.	No	N/A	No	N/A	High
159	Ali, A et al 2013	Neonatal unit, Hyderadbad, Pakistan	2	3	4	4 (audit of all patients in 2009)	1554 neonates	y	Not clear	3 (all neonates admitted)	6	All gest ages	Death in neonatal period - not clear.	56/106 neonates died due to prematurity	No	N/a	No	N/A	No	N/A	Low
44	Dilli et al 2012	Maternity Teaching Hospital Infants less than 33 weeks	2	3	5	2	56	Not clear	18-24 months	1	6	28-31 weeks	No	N/A	Yes - IVH, RDS, PDA, sepsis, NEC, BPD, ROP, TFTs	Transient hypothyroxinemia without tSH elevation may not be an important cause of problems in neurological and mental development detected in 18-24 months	No	N/A	Yes -Bayley Scales of Infant Development PDI and MDI, CP defined as a non-progressive CNS disorder with abnormal muscle tone, moderate to severe CP was non ambulatory or required and assistive device for ambulation. Bilateral severe hearing loss was defined as permanent hearing loss that required amplification in both ears. Bilateral blindness defined as absence of functional vision in either eye…	Disabling CP in 12.5% of infants and neurodevelopmental impairment in 50% of infants. Minimal impairment in 17.9% of subjects.	Low
35	Chaudhari et al 1990	KEM Hospital Pune All babies <37 wks discharged from NSCU for 1 Oct 1987-30 Sept 1989.	2	3	7	2	264 preterm babies discharged. 172 only reviewed and 110 tested at 18 months and 81 at 24 months	YES	24 months	1	6	28-36 weeks	No	N/A	Yes - looked at risk factors, birth asphyxia, hyperbilirubinaemia, sepsis, ivh, RDS, convulsions and apnoea	Preterms with risk factors had statistically significant difference in performance on the mental scale at 9 and 12 months and on the motor scale at 3, 9 and 12 months.	No	N/A	Yes - Bayley Scales of Infant Development (Indian Norms)	Complicated preterm births had mean motor and mental quotients which were borderline.	Moderate
39	Chiabi et al 2011	Yaounde Gynaeco Obstetric and Paediatric Hospital Neonates admitted to neonatal unit <2500g.	2	3	7	2	980 controls 980 LBW babies	YES	In hospital	2	6	All	Mortality to discharge	Mortality rate of <1500g was 37.7% with risk factor of prematurity. Highest in premature neonates with neonatal sepsis leading cause of death	No	N/A	No	N/A	No	N/A	Moderate
43	Das et al 1992	Neonatal Unit University Hospital Banaras Hindu University or Ishwari Memorial District Hospital, Varanasi and 10 villages of Cholapur Block Varanasi. All preterms <37 weeks or full term IUGR babies weighting between 1.5 and 2kg.	2	4	4	2	259	NO	3 months	4	6	Premature births was in top 5 causes of death - higher in suburbs	Mortality during study	LBW significantly higher than full term appropriate for gestational age. No significant difference between hospital and village	No - diagnosed by physician looking at septicaemia, aspirations, diarrhoea, upper respiratory tract infection, tetanus and hyperglycaemia	Only statistically significant when comparing preterm (more common in preterm)	No	N/A	No	N/A	Moderate
188	Saleem, A. F et al 2013	NICU at Aga Khan University Hospital, Pakistan	2	4	4	4	104 neonates	Y	Until discharge	3	6	Mean gest age of 30 weeks	Yes - death in hospital	65% of neonates who died were premature. Gest age was a risk factor for death OR 0.7 (0.6–0.9) p 0.02	No	N/A	No	N.A	No	N/A	Low
169	De A et al 2013	Tertiary care hospital in Mumbai, India	2	5	5	4	80 neonates	Not clear	Until discharge?	3	6	Not clear	Yes - ?until discharge	Prematurity not a significant risk factor to death	Yes	Risk of acetinobacter infection	No	N/A	No	N/A	Low
162	Hamouda, B	Paediatric unit of pedia- tric unit of Tahar Sfar Hospital in Mahdia, Tunisia, between January 1996 and December 2010.	2	6	5	4	44 cases	Not clear	Unclear	3	6	All infants	Yes - mortality from meningitis at any age	The mortality rate was 15.9 % and risk of death in prem group (<37 wks.) was significant and the rate of neurological	Yes - neonatal meningitis.	Not specific for prematurity	No	N/A	No	N/A	Low
81	Kuti et al 2002	Wesley Guild Hospital, Ilesa, Nigeria (live born neonates) All singleton preterm births delivered alive in labour ward of hospital between Jan 1996-Dec 2000	2	2.4	5 (hospital ward)	4	4557 live births	YES	To discharge	1	9	All1,3,4 (GA routinely determined from patient's LMP and confirmed by USS). All preterms were assessed by paediatricians and GA assessed using Ballards. 17% of births did not have an USS	Neonatal mortality defined as death occurring before discharge	Neonatal mortality higher than developing countries data. All those born before 28 weeks died. Preterm 178.9/1000 died.	No	N/A	No	N/A	No	N/A	Low
140	Vural et al 2007	University Hospital NNU Prems <33 weeks admitted Aug 2003-Jan 2005	2	3	4	3	103	YES	To discharge?	1 - Prem <33 wks	9	<33 weeks - LMP and USS	No	N/A	Risk factors of development of IVH.	GA was a statistically significant risk factor and there was a high incidence when compared to developed countries.	No	N/A	No	N/A	Low
50	Feghi et al 2012	All educational hospitals in Khuzestan province All neonates<32 weeks in NICUs or/and <2000g meeting criteria for eye examination	2	3	7	3	576	YES	Unclear	3	9	<32 weeks (LMP or USS )	No	N/A	Yes - ROP, duration of O2 therapy, jaundice, phototherapy, transfusion, sepsis. Other eye findings e.g. Intraocular pressure, glaucoma, cataract, strabismus	Increased risk of ROP with gestation. P<0.001	No	N/A	No	N/A	Low
129	Sonkusare et al 2009	Kasturba Hospital, Manipal, India (Level III centre) File review of all premature infants born from 1 May 2002-30 Sep 2003 in centre	2	3	4 (level III centre)	3	153 preterm deliveries	YES	Not clear	1 - All prems (30-35 weeks?) in certain time period	9	30-35 weeks - (LMP, obstetric history and exam, prenatal uss and postnatal physical exam)	Yes - neonatal mortality rate until discharge	14.5% neonatal mortality rate until discharge	Yes - IVH, sepsis, RDS, hyperbilirubinaemia	Higher rate of morbidity in C/S group but not significant	No	N/A	No	N/A	Low
3	Adair et al 1999	Metro Cebu second largest metropolitan area in the Philippines. Urban and rural communities within and surrounding Cebu city. All pregnant women in these communities who gave birth in a 1 year period from 1983 to 1984 From all barangays (local administrative units) of Metro Cebu, 17 rural and 16 urban barangays were randomly selected for study. Home visits to collect data during the last trimeste…	2	1.2	5	2	2011 children with complete data from birth, 24 months and 2 follow up surveys	NO	12 years	3 - Pregnant women in area during time	5	Any <37 weeks - LMP but when there were pregnancy complications or an uncertain LMP or when infant weighed less than 2500g at birth, Ballard method used	Those who had more than 4 prenatal visits, risk of death diminished by 1.18 for each additional week of gestational age at time of birth, RDS increased chance of death by 1.68, NEC increased rate of death by 2.594 and mechanical ventilation increased risk of death by 4.3 and Apgar of <7 increased risk of death by five times.	N/A	Not in this paper	N/A	Yes	The effects of prematurity alone or in combination with birth weight categories did not affect stunting long term	No	N/A	Moderate
47	Elizabeth et al 2007	Tertiary care teaching hospital in Kerala Cohort of preterm and term LBW and term controls	2	2.4	5	1	498 babies - 247 normal term control, LBW (251) with 57 of those being preterm LBW	Not clear	2 years	4	9	Not clear - Prenatal USS and new Ballard score	No	N/A	Total protein, albumin cholesterol, triglycerides, calcium, magnesium, zinc andiron	Total protein, albumen, cholesterol, calcium, magnesium, zinc and iron all lower in prem group at birth and at 2 years - zinc, iron , magnesium, calcium all lower but also low in term lbw and numbers small.	Yes	Weight, length, OFC, MUAC and BMI all much lower in prem group at birth and at 2 yearsrs significantly. In prem group 64.3% were moderately PEM vs 1.2% in term controls and 23.5% in term LBW at 2 yrs.	No	N/A	Low
78	Kuklina et al 2004	Four villages in eastern Guatemala previously included in a community based food supplementation trial conducted by INCAP (Instituto de Nutricion de Centro America y Panama) All pregnancies between 1991 and 1999 identified by routine surveillance. Children with data on walking, anthropometry at birth and 12 months of age and dietary intakes at 12 months included.	2	1.1	1	3	218 children were included in analysis	Not clear	15 months	5	9	Not clear <37 weeks, 37-41 weeks and 41+ - LMP and confirmed by USS in a subsample	No	N/A	Yes - biweekly recall (diarrhoea/anorexia morbidity % time ill or other morbidity % time ill.	Infants from the medium morbidity group walked 1 month earlier than those from the high morbidity group.	Yes - birth weight, birth length, LAZ, WAZ at birth and 12 months	N/A - did not look at prematurity and growth together - just growth and walking outcomes	Yes	17 milestone gross motor development scale (created by Jahari, AB and Pliitt, E in Indonesia study published in Eur J Clin Nut 2000	Low
37	Cheung et al 2001	Four different areas of Lahore, Pakistan. A typical village, a per-iurban slum on the periphery of Lahore, a typical urban slum area and an upper middle class group.	2	1.2	5	3	1476 infants, 1024 followed up until 24 month, 40% loses due to residential movement and further 40% due to death	Not clear	24 months	5	5	Not clear (Dubowitz and LMP)	No	N/A	Occurrence of diarrhoea	No association between diarrhoea and gestational age	Yes - length, weight, MUAC, OFC	Not analysed gest vs growth but have done in paper below	No	N/A	Moderate
195	Stephenson, B et al 2013	Pediatric Department, Kerala, India	2	3	3	3	69 infants	Not clear	12 months	3	6	Not clear	No	N/A	RDS, IVH, sepsis, meconium aspiration, asphyxia, hypoglycaemia, NEC	Not clear	Yes-OFC, height and weight	Preterm babies gained weight and head circumference quicker than term infants	Yes - Trivandum developmental screening chart, Developmental Scale for Assessment of Indian Infants II, Amiel Tison assessment of tone.	No differences statistically	Low
192	Seth, B et al 2014	Neonatal unit in Northern India	2	7	7	2	100 enrolled but 76 followed up	Not cler	Until 34 weeks GA	1	5	Ave 31 weeks	Death at 34 weeks - 5 died	5 died	neonatal (morbidities, required interventions and outcome) details				the score for motor development and vigour (MDV) and alertness and orientation (AO) domains of neurobehavior were assessed by NAPI at 34 completed weeks of PCA	Statistically different mean MDV scores between those with low pH and those with normal pH.	Low
68	Ho et al 1998	Regional referral hospital with 9500 births annually. One third are outborn All babies of birth weight 1500g or less born in hospital or referred for neonatal care during the year 1993 were enrolled prospectively.	3	3	4	2	83, 60 controls	YES	2 years	2	1	<1500g mean 32.8 weeks	Duration of study	No significant difference between control and study	Standard recording of motor deficit, Inter-accistics Denmark, Cardiff Acuity test	No significant difference	2 year height, weight and head circumference using NCHS growth charts. Those falling below 10th percentile had growth failure	Study group significantly lower than control	Griffiths Scale for Development	No significant difference	Moderate
31	Charpak et al 2005	Clinica San Pedro Claver (Columbian Social Security Referral Hospital)	3	2.5	7	3	129	YES	12 months	2	1	31-36 weeks, 1200g-2000g	No	N/A	No	N/A	Anthropometric data compared with USA National Children's Health Survey standards. Birth and term weight compared using Babson-Lubenco standards.	More immature births require more additional supplements to achieve adequate weight at term.	No	N/A	Low
85	Liu et al 2007	Three counties in Mongolia exposed to arsenic. All women on verification of conception	3	1.1	5	2 (used UNICEF data to compare	22,000 pregnancies	YES	28 days?	3	6	Not clear <37 weeks, 37-41 weeks and 41+	NMR	NMR (5/1000)	No	N/A	Birth weight and birth length and length and weight at 28 days	Mean length and weight at 28 days	No	N/A	Moderate
94	Morris et al1997	Pelotas Brazil, wealthy part of the country - five maternity wards visited daily. All 6410 hospital births occurring during 1993 were monitored.	3	1.3	5	3	6410 5249 live births 5160 included in study	Not clear	At least 12 months	5	2	All included	Duration of study	Infants in lower tertiles of length and ponderal age at highest risk.	Duration of study, number of hospitalisations	Most frequent amongst short low ponderal index	Dubowitz score and ponderal index (weight/length3)	Birthweight increased with each gestational age, birth length and ponderal index	Denver II test	Reduction in risk of development delay with increasing length and ponderal index	Moderate
166	Chen, L. et al 2013	National Taiwan University Hospital, Mackay Memorial Hospital and the Branch for Women and Children at Taipei City Hospital in Taiwan during the period of 2006 to 2008	3	4	4	1	178 infants	Y	"When infants approached term age"	4	6	<37 weeks (Mean - 29-30 weeks)	No - excluded if had died	N/A	length of hospital stay, duration of respiratory support (i.e., ventilation, continuous positive airway pressure[CPAP] and oxygen use), prevalence of neonatal diseases including patent ductus arteriosus (PDA) requiring medication or surgery, BPD (oxygen requirement for ≥28 days plus treatment with b30% oxygen or CPAP at 36 weeks' PMA) [13], IVH assessed by cranial ultrasound, ROP examined by pedi…	differences in the rates of stage II–III ROP (p=0.007)	Growth parameters included enteral feeding at discharge (≥ or b400 c.c./day), occurrences of a feeding desaturation event (oxygen saturationb80%) within one week of discharge, average daily weight gains from birth to term age, and weight and normalized weight (z) at term age. For infants who were discharged before 40 weeks PMA,weight at term age was measured at the neonatal follow-up clinic.	feeding desaturation (p=0.05), and the daily weight gain (p=0.07) favouring the intervention group	Neurodevelopment was assessed by trained research assistants using the Neonatal Neurobehavioral Examination—Chinese version (NNE-C) [14], which consists of three sections: tone and motor patterns, primitive reflex and behavioral response. Each section contains nine items, and each item is scored on a three-point scale. The NNE-C has acceptable reliability and predictive validity when used with Ta…	No differences	Good
16	Barros et al 2005	Pelotas - city in the South of Brazil, More than 90% of deliveries take place in hospitals and 93% of women receive antenatal care. Three private non-profit hospitals with a fourth indigent patient hospital - Catholic run. All births at the city's four maternity hospitals during the year (98% of births in the city).	3	1.3	5	2 (comparing same facilities 1984, 1993, 2004)	6011 (1984) 5304 (1993) 2427 (Jan-Jul 2004)	Not clear	Unclear	5	3	All	Fetal and neonatal mortality rate - visits to hospitals cemeteries, vital registration offices and child's health department	NMR fell steadily amongst GA and BW groups.	No	N/A	No	N/A	No	N/A	Moderate
118	Sabet et al 2009	Birth to 20 cohort sample Baragwanath Hospital, Soweto, South Africa All children in the Soweto area born between Apr-Jun 1990	3	2.4	5	2	3272, 2389 at 12 years	NO	12 years	5	3	<2500g using hospital scales	No	N/A	No	N/A	No	N/A	Youth Self-Reported scores questionnaire	No evidence of association between LBW and emotional and behavioural outcomes.	Low
120	Samms-Vaughan et al 2001	Variety of setting in Jamaica - community, hospital All live births born in a two month period AND all neonates admitted to a SCBU in two months	3	2.4	3 (2/20 hospitals had ventilation)	2	1823 study, 9563 control	YES	Over 6 months	3 - All births and then those admitted to SCBU for whatever reason	3	All	Perinatal mortality survey	Unclear	Perinatal morbidity survey	<1500g and 32-36 weeks most likely to be admitted to NICU	No	N/A	No	N/A	Moderate
154	Yunis et al 2003	Five hospitals in Greater Beruit serving predominantly caucasian residents of Lebanese nationality.	3	2.4	5 (some admitted to NICU and some not - all born in hospital based facility	4	3372	YES	In hospital - last outcome was "prolonged hospitalisation"	5	3	<27 weeks to term	No	N/A	Prolonged hospitalisation >7 days	NICU admission and prolonged hospitalisation sig correlated with low SES	No	N/A	No	N/A	Low
151	Xiaolu et al 2009	11 tertiary hospitals with approx 70% of all neonatal nursery beds in Zhejiang province serving 39 million - 9 nurseries were regional referral centres All neonates with some medical problems admitted to the 11 units from Jan 2007-Dec 2007 were enrolled in the study. If stayed in unit >24 hours and if had medical problem - newborn at risk or at need of some intensive care or close observations.	3	3	4	3	44,362 infants	Not clear	Not clear - in hospital	6	3	<33 weeks, 34-36 weeks, >37 weeks	Yes - in hospital mortality	0.8% of late preterm admissions died	RDS, hyperbilirunbinaemia, hypoglycaemia and sepsis, support with ncPAP or mechanical ventilation	Increased risk or RDS, IVH, hyperbilirubinaemia, and hypoglycaemia	No	N/A	No	N/A	Low
54	Gao et al 1995	Shanghai Sanitation and Anti-Epidemic station - information from case records at hospital. Infants who died in 1990 before 1 year of age in hospitals in the Shanghai Sanitation and Anti-Epidemic station centres.	3	5. later recruitment	5	2	532	YES	1 year	5 - All deaths	3	All	Survey of infants who died before reaching 1 year	Premature births was in top 5 causes of death - higher in suburbs	No	N/A	No	N/A	No	N/A	Moderate
52	Fernandes et al 2012	Tertiary teaching hospital Sao Bernardo do Campo, Brazil All cases with PPROM <28 weeks	3	3	4	4	66 infants	NO	To discharge	7 - PPROM <28 weeks	4	24-34 weeks	Yes - Perinatal mortality - % of infants died out of those delivered with a PPROM <28 weeks (surviving to discharge)	57.6% survived to discharge	Yes - stay in unit, need for intubation, BPD, RDS, neonatal infection	42.9% had a neonatal infection, 53.1 % had RDS, 8.2% had BPD. 55% needed intubation	No	N/A	No	N/A	Low
53	Filho et al 2009	Hospital de Clinicas de Proto Alegre, Southern Brazil Infants <1.5 kg or <32 weeks at birth	3	3	7	3	467	YES	To 45 weeks	4	4	<1500g, <32weeks	No	N/A	Binocular indirect ophthalmoscopy. Scleral indentation when necessary	In 2 out of 3 study groups, GA was significant factor in development of retinopathy of prematurity.	No	N/A	No	N/A	Moderate
160	Al-Riyami, N	January 2006 to December 2011 at Sultan Qaboos University	3	2	4	4	44 neonates	N	Not clear	3 (PPROM <26 wks.)	5	mean gest age 29 weeks (/17 - 40 wks.)	Within 24 hours of delivery PNMR	20% miscarried, 9% stillbirth, 16% died within 24 hours	Yes - neonatal sepsis, RDS and hernias	Yes - percentage of each given but really small numbers	No	N/A	No	N/A	Low
87	Mancini et al 1999	Nursery annexed to the maternity in the clinics hospital medical school of Sao Paulo University. All VLBW infants <1500g admitted to NNU between Jan 1995-Dec 1995.	3	3	4	3	101	Not clear	Duration of stay?	2	5	<1500g (1,2,3) Gestational age was determined by the date of LMP whenever this differed by up to 2 weeks as indicated by USS performed until the 20th week of gestation, Dubowitz of New Ballard methods were used as reference.	NMR	31/101	Intraventricular Haemorrhage diagnosed by ultrasound and classified using Papile et al	IVH occurs with lower birth weight, lower gestational age (<30 weeks) and longer hospitalization length	No	N/A	No	N/A	Low
190	Satar, M et al 2014	NICU of the Çukurova University Balcalı Hospital, Adana,	3	4	4	4	97 infants	Not clear	Not clear - ?only until time of screening	3	5	Mean gest age 30 weeks	No	N/A	stage of ROP was also diagnosed according to the International Classification of Retinopathy of Prematurity (ICROP). ROP was graded according to the classification system developed by the International Committee for the Classification of ROP. duration of mechanical ventilation, duration of oxygen therapy, intraventricular/ periventricular hemorrhage (IVH/PVH), prenatal steroid therapy, surfactant…	Gestational week was significantly lower in ROP (+) patients in the 2nd period (p<0.01)	No	N/A	No	N/A	Low
191	Serce, O et al 2014.	NICU, Istanbul, Turkey	3	4	4	1	244 infants	Not clear	Until discharge	4	5	Mean gest age 28.8 weeks	Death prior to discharge	No differences in the two groups.	“Modified Bell Classification” was used to define NEC [11],and “Papille Classification” for IVH, culture proven late onset sepsis = two clinical signs (as listed in paper) and culture positive at 48 hours. time to reach 100 mL/kg/day of enteral feeding, weight gain per week, oxygen dependency at 36 weeks, duration of hospitalization	No difference between groups	No	N/A	No	N/A	Good
130	Sornsrivichai at al 2008	Four community-based cohorts from four districts from different parts of Thailand. All children born in areas were recruited for larger study (antenatal recruitment).	3	1.2	5	3	2739	Not clear	1 year	3 - All children from antenatal cohort then admitted to hospital in first year	6	All	No	N/A	Diagnosed in hospital and separated into principle diagnosis, co-morbidity and complications.	Incidence of 454.9/1000 and incidence of 23.0/1000 disorders related to short gestation and low birth rate	No	N/A	No	N/A	Low
109	Pileggi et al 2009	Randomly selected health facilities in Brazil using a stratified multistage cluster sampling design to obtain a sample of health institutions. All women admitted for delivery over a three month period in institutions with more than 6000 deliveries.	3	1.2	5 (randomly selected hospitals)	7 (secondary analysis of cross sectional study)	15377	Not clear	Not clear	5	6	All	No. of early neonatal deaths during the first week of life among those with life-threatening conditions at birth (gestational age <30wks, v.low birth weight, Apgar score at 5mins of life <7)	80% of all early neonatal deaths due to life-threatening conditions	No	N/A	No	N/A	No	N/A	Moderate
153	Xu et al 1998	Geographically defined population in Northern Finland Births of pregnant women in period of 1 year (1985-1986) 99% of births in this area of Finland and 18 hospitals in China with delivery rooms and NICUs in five districts.	3	1.3	7	2	9219/9207	NO	To discharge? 1 week?	5	6	>28 weeks, >1000g	Perinatal mortality - stillbirths + deaths within first week of life.	China perinatal mortality more than twice as high as Finland.	No	N/A	No	N/A	No	N/A	Moderate
155	Zhang et al 1991	Stratified sample of 29 hospitals selected from Shanghai Municipality - only secondary hospitals which delivered babies - (SB or live births) Every birth (stillborn or live) whose birth weight was >1000g or gest age >28 wks if birth weight was unavailable was recorded in 12 months. Live born infants with complete information on parental SES and neonatal outcomes (Feb 2000-Jan 2002)	3	1.3	5 (secondary and tertiary hospitals)	2	1134	YES	To discharge	4	6	>1000g, <28weeks	Early neonatal deaths. Antepartum foetal deaths, Intrapartum foetal death	Preterm had higher mortality rates. Preterm in Shanghai four times higher risk of early neonatal death than Oklahoma USA.	No	N/A	No	N/A	No	N/A	Moderate
158	Adinma E et al 2013	Nnamdi Azikiwe University Teaching Hospital over 10 yrs 2000-2010	3	2	5	4	57 women with preeclampsia	n	Perinatal period	3 preeclamptic women	6	up to term	Yes - labelled as PNMR but not defined in the article	25.5% of deaths were due to prematurity, 12/13 deaths were in babies less than 37 weeks	No	N/A	No	N/A	No	Na	Low
7	Amorim et al 1999	Recife tate of Brazil, Admitted at the Instituto Materno Infantil de Permambuco during a 14 mo period Women with preeclampsia and a gest age between 26-34 wks randomly assigned to have Betamethasone or not. Singleton pregnancy with live fetus and well documented gestational age with lung immaturity confirmed by the foam test in fetuses of 30-34 wks gestation an a likely minimal interval of 24 hrs…	3	2.3	4	1	218 pregnant women	NO	Not clear - hospital stay	1 - Women with severe preeclampsia and gestational age between 26 and 34 weeks	6	25-34 weeks "Well- documented gestational age"	Neonatal mortality rate and still birth	Neonatal mortality rate lower in the corticosteroid group (14%) than in the placebo group (28%). Still birth rate - not significantly different	RDS, (criteria of Centro Latino Americano de Perinatologica include progressively increasing dyspnoea and other signs of respiratory distress oxygen requirement at 24 hours of birth and characteristic radiological features - severe or generalised microreticulargranular infiltrate, extensive or severe air bronchogram diffuse or absent heart image. IVH (USS), PDA(Echo), Perinatal infection, NEC (ab…	Frequency of RDS significantly reduced in the corticosteroid group 23% with respect to the placebo group 43% and RR if IVH, PDA and perinatal infection were significantly decreased in the corticosteroid group	No	N/A	No	N/A	High
76	Kolatat et al 2000	Department of Obs and Gynecology, Siririaj Hospital. High risk pregnancies	3	2.3	4	3	961	YES	Not clear	3	6	All	No	N/A	Occurrence of perinatal asphyxia	Significantly correlated with birth weight. Premature delivery one of most common high-risk condition leading to asphyxia	No	N/A	No	N/A	Low
105	Dexiprom 1999 (Cochrane)	Six hospitals in South Africa: Western Cape, Pretoria, Kalaforn, Free State, Tygerberg - all serve mainly indigent populations. All women with premature rupture of membranes, not in labour between 28-34 weeks gestation or clinical evidence of fetus weighting between 1-2kg and no evidence of infection or antepartum haemorrhage	3	2.3	4	1	208 infants in two groups	YES	72 hours	2	6	28-34 weeks	Perinatal death, Intrauterine death, early neonatal death, late neonatal death, perinatally related death	3.8% death index group vs 9.7% perinatal death in saline group - not significant in all of babies up to 72 hours	RDS, need for mechanical ventilation, NEC , neonatal infection	No differences between groups	No	N/A	No	N/A	Moderate
45	Dobbelaere et al 1995	Kalafong hospital (mums coming from Saulsville and Atteridgeville and Pretoria and then elsewhere (still births included). All women delivering babies <2.5 kg during a 6 month period (Dec 1991-May 1992).	3	2.4	5	3	550 babies of 508 mothers	YES	Unclear	2	6	<2500g	Perinatal mortality rate	Higher in LBW	No	N/A	No	N/A	No	N/A	Moderate
133	Tanir et al 2003	University Hospital Clinic, Turkey from 1996-2001 All preterm deliveries with premature rupture of membranes in hospital during the time period	3	2.4	7	4	180	NO	Not clear	1 - Prem	6	<34 weeks	no	N/A	Neonatal outcomes defined as: none, RDS, narcotizing entercolitis, early neonatal sepsis, pneumonia, neonatal death, duration of stay in NICU.	All outcomes were found out to be result of GA.	No	N/A	No	N/A	Very Low
178	Koum, D et al 2014		3	3	3	4	813 neonates	Y	Until discharge	3 (all neonates)	6	All neonates	Mortality during admission	15.3% deaths in prem neonates (3,3 (2,0–5,6))	Not specific	N/a	No	N/A	No	N/A	Low
4	Afjeh et al 2012	Mahdieh Hospital in Tehran All newborns given mechanical ventilation	3	3	4	2	81	Not clear	in hospital	7	6	All	No	N/A	Yes - duration of hospitalisation, duration of mechanical ventilation, given dexamethasone, given ranitidine, tracheal aspirate positive, sputum positive, blood gas, leukocytosis, blood culture findings	Patients with pneumonia had worsening blood gases, positive CXR, purulent secretions and leukocytosis. No significant differences in terms of gestational age with and without VAP	No	N/A	No	N/A	Moderate
8	Araujo et al 2011	Reference ICU in Brazil Preterm infants transported to NICU	3	3	4	2	123 + 61	Not clear	To discharge	1	6		Yes - Mortality in hospital	percentage of deaths was 18% in transport group and 8.9% in control group	Yes - hypoglycaemia, hypothermia, hypoxemia	Higher percentages of hypoxemia, hypothermia and hypoglycaemia	No	N/A	No	N/A	Moderate
10	Badiee et al 2007	NICU of Alzahra Hospital, Isfahan, Iran Preterm infants <32 wks between Nov 2003 and Jan 2005 in whom it was possible to do cranial uss studies	3	3	4	2	31 infants with IVH 90 controls	YES	Not clear	1 - Prem with IVH vs prem without IVH	6	Average 29-30 weeks	No	N/A	Yes - risk of IVH	PPV at birth, low 5 min Apgar, PDA, no of ETT suction duration of mach vent and use of surfactant therapy, maternal C/S and use of steroids decreased risk of IVH	No	N/A	No	N/A	Low
11	Ballot et al 2012	Charlotte Maxeke Johannesburg Academic Hospital All VLBW infants born and treated in a period of time	3	3	4	4	152 followed up	Not clear	17 mo median	2	6	28-34 weeks +	No	N/A	No	N/A	No	N/A	Yes - Bayley Scales of Infant Development III cognitive, motor, language	Cystic PVL associated with poor cognitive motor and language function. Duration of supplemental oxygen, prolonged hospitalisation, resuscitation at birth and increased maternal parity increased risk of Bayley Scales of Infant Development III . No statistically significant effect of gestational age	Low
13	Ballott et al 1992	NICU at Johannesburg hospital Files of the neonatal follow up clinic were reviewed. Clinic for all NICU survivors until the age of 3 years but high drop out rate in first year	3	3	4	4	85 NICU survivors	Not clear	Possibly 1-3 years - seen in follow up clinic. Not very clear	6	6	Not clear	No	N/S	No	N/A	No	N/A	Early language milestone scale comprising auditory receptive an auditory expressive and visual components. Tympanomtetry and free field audiometry with a pure tone audiometer. Neurodevelopmental status is assessed by physio who gives a neurodevelopmental score (NDS) to the child	28% of children had abnormal ELM or FFR result and 18 failed an FFR but 14 of these were normal on follow up. Eleven children failed an ELM of whom 5 had speech problems. Correlation of ELM and neurodevelopmental scores and IVH.	Low
23	de Almeida et al 2008	All live births at gestational ages between 23 and 34 weeks with bw of 400-1500g in 8 pubic maternity units at tertiary university hospitals located in five cities in three Brazilian states	3	3	4	3	17,219 infants	YES	72 hours of life	4	6	23-33 +6 weeks (best obstetric exam or by physical exam at birth)	Yes - mortality in first 72 hours of live births	Early neonatal death rates varied from 5% at unit a to 31% at unit H	SNAPPE-II (Score for neonatal acute physiology) with infants over 39 as having poor prognosis, RDS on clinical and radiological criteria, PDA according to clinical or echo findings, sepsis defined by clinical criteria with or without a positive blood culture, use of 1 dose of surfactant, assisted ventilation	SNAPPE II > 40 in 9-29%, RDS in 53-77%, PDA in 28-49%, sepsis in 3-51%, one dose of surfactant in 32-68% and assisted vent in 70-95%	No	N/A	No	N/A	Moderate
24	Burger et al 2011	Neonatal wards of Tygerberg Children's Hospital Preterm infants < 1250 g admitted to wards	3	3	4	2	115 infants	Not clear	1 year	1	6	27-36 weeks	No	N/A	No	N/A	No	N/A	Yes - spontaneous movements (Prechtls qualitative assessment of general movements, Peabody Developmental Motor Scale, Alberta Infant Motor Scale, Amiel Tison and Gosselin method for describing specific upper motor neurone abnormalities such as muscle tone and reflexes.	Significant relationship between fidgety movement outcome and the infants final motor outcome at 12 month corrected age. Nine infants found to have cerebral palsy and five were suspect.	Low
27	Carvalho et al 2011	NICU in 2 Brazilian institutions in Rio De Janeiro. VLBW infants with a gest age between 24-33 weeks with premature birth due to severe placental dysfunction identified by Doppler abnormalities.	3	3	4	3	86 fetuses and newborns met criteria for study	NO	During hospitalisation	4	6	24-33 weeks	Not clear - early and late newborn? In hospital	SNAPPE II area under the curve was 0.86 for mortality	Presence of 1. IVH grade 3 or 4, 2. ROP stage 3 or 4, 3. PVL or 4. BPD at 36 wks or 5. NEC	SNAPPE II area under the curve was 0.76 for morbidity	No	N/A	No	N/A	Low
28	Celik et al 2013	Zekai Tahir Burak Maternity Hospital	3	3	4	2	605 late preterm and 1477 term infants	Not clear	Not clear	1	6	All but broken up into 34-36+, <34 and >37	Yes - admission mortality	Admission mortality 0.6% in late preterm and 0.2% in term. Mortality rate of late preterms was 2.1% of those late preterms.	Yes - RDS, jaundice, polycytemia, hypoglycaemia, feeding difficulty, sepsis, dehydration and other congenital anomalies.	Increased risk of RDS, jaundice, polycythemia, hypoglycaemia, feeding difference	No	N/A	No	N/A	Moderate
29	Cetinkaya et al 2012	Uludag Uni School of Medicine NICU Infants less than 37 weeks in NICU	3	3	4	2	501 infants with 88 with NEC	YES	Not clear	1	6	28-34 weeks	No	N/A	Yes - NEC stage 2 or 3	Incidence of NEC in preeclamptic mothers much higher. No signifigance by gestation	No	N/A	No	N/A	Low
57	Gharaibeh et al 2011	Neonatal Intensive Care Unit, King Abdullah University Hospital <2000g or 32-34 weeks who had ROP screening	3	3	4	4	91 preterms	Not clear	Not clear	7 - ROP	6	26-35 weeks	No	N/A	Yes - ROP	ROP found in 20% of those >1500g	No	N/A	No	N/A	Very Low
64	Grupo Colaborativo Neocosur 2002	Eleven NICUs in four South American countries All live inborn infants with birth weights 500-1500g in centres. From Oct 1997 to Aug 1998	3	3	4	3	385 infants	Not clear	Not clear	2	6	22>34 weeks	Death rate in hospital	Gestational age was significantly a risk factor for death (p0.04 and OR of 0.87. Mortality was 100% at 22 and 23 wks GA and decreased steadily from 24 through to 31 wks, mortality rates remained unchanged through 34 wks and worsened thereafter.	Yes - BPD	Increased risk of BPD with gestational age p <0.001 OR 0.76	No	N/A	No	N/A	Low
65	Guven et al 2013	Umraniye Training and Research Hospital, Istanbul Preterm infants <32 weeks and or <1500g admitted with RDS and given surfactant within the first two hours.	3	3	4	2	72 infants	Not clear	Not clear	4	6	<32 weeks	No	N/A	Yes - air leak, BPD, IVH, ROP, NEC and duration of mechanical ventilation and total oxygen supplementation	Infants ventilated with VG mode had significantly shorter duration of ventilation and need of total supplemental oxygen. Incidences of oxygen related short term complications including BPD, ROP and IVH also significantly lower in these infants compared to those ventilated conventionally	No	N/A	No	N/A	Moderate
84	Liu et al 2008	Beijing Obstetrics and Gynaecology Hospital and Qin Hangdog Maternity and Infants Hospital <37 and >26 weeks Jan 2004-July 2007	3	3	4	3	921 prem babies	YES	Not clear	1	6	26-37 weeks	No	N/A	Yes - PVL	Correlation between PVL and gest age, also with perinatal info and PVL	No	N/A	No	N/A	Low
91	Meneguel et al 2003	Hospital Sao Paolo Newborns whose mothers were exposed to antenatal corticosteroids and those who were not but who matched with exposed neonates and who were <34 weeks.	3	3	4	4	1023 patients (28 records not found)	YES	To hospital discharge	1	6	<34 weeks	Intrahospital deaths	No prenatal care increased death risk by 1.98 times, Gestational age increased risk of death by 1.18 for each week of gest age, rds increase death rate by 1.68, nEC increased risk by 2.594, mech ventilation increased risk of death by 4.3 and apgar <7 increased risk of death by almost 5x	RDS, use of surfactant, mech ventilating, BPD, IVH, NEC (all given clear definitions)	Less RDS in steroid group (OR 0.278), gestational age - diminished risk of RDS for each week gestation by 1.33, apgar at 5th min <7 decreased risk of RDS by 2.48.	No	N/A	No	N/A	Moderate
96	Nayeri et al 2005	Imam Khomenini General Hospital, Tehran Neonates of <37 weeks born in 1995 or 2000	3	3	4	4	142 with not dexamethasone in 1995 and 140 with dexamethasone in 2000	Not clear	Discharge?	1	6	<37 weeks	No	N/A	RDS	Statistically different level of RDS in those without antenatal steroids	No	N/A	No	N/A	Moderate
103	Ozbek et al 2011	Behcet Uz Children's Health and Diseases Training and Research Hospital Premature Intensive Care Unit Premature infants with ROP	3	3	4	3	179	Not clear	4-6 weeks	7	6	24-37 weeks	No	N/A	Yes - staged ROP	54% stage 1 ROP, 12.4% grade 2, 27% grade 3 and 1.5% grade 5	No	N/A	No	N/A	Low
107	Petdachai 2004	Newborn Intensive Care Unit of Prachomklao Hospital, Petchaburi, Thailand Infants <30 days who required mechanical ventilation for >48 hours	3	3	4	3	170	Not clear	To discharge	3	6	All	No	N/A	Development of ventilator-assisted pneumonia (VAP)	No difference in GA between those who developed VAP and those who did not. Significantly lower birthweight in those who developed VAP	No	N/A	No	N/A	Low
112	Profit et al 2010	Neonatal intensive care in Mexico. Babies born at 24-26 weeks, 27-29 weeks and 30-33 weeks in NICUs in Mexico.	3	3	4	3	42	Not clear	To 28 days	1 & 2	6	<33 weeks	Mortality up to 28 days measured	Life expectancy increased with use of NICU	Defined as three categories: None, Minor disability, Major disability	Use of NICU substantially increased the chances of a disability free life.	No	N/A	No	N/A	Low
113	Qublan et al 2001	Prince Rashed and Prince Zaid Military Hospitals Patients with a singleton pregnancy of 27-34 weeks gestation complicated by PROM	3	3	4	1	139 patients	NO	During hospital stay?	1	6	27-34 weeks	Perinatal mortality rate	Significantly reduced PNM in prem infants of the corticosteroid treated women compared with controls. Also PNMR significantly decreased among the corticosteroid treated group in the gestational subgroups 31-2 and 33-34 weeks and in all birth weight subgroups	Yes - RDS, NIC, IVH and days of hospital stay	RDS was caused increased PNMR in the control group of prems	No	N/A	No	N/A	Moderate
115	Reis A et al 2012	Premature babies at hospital NICU in Rio Brazil <37 weeks and <1500g from Jan 2004-Jan 2008 in NICU de Risco	3	3	4	3	303 babies	Not clear	6, 12, 24 months	1	6	<37 weeks	No	N/A	No	N/A	No	N/A	Yes -Bayley Scales of Infant Development II	Significant decrease at 18-24 mo cGA seen. Did not show stability in this population. Risk factors of male gender and neonatal pneumonia on Bayley Scales of Infant Development II	Low
131	Surmeli-Olnay O et al 2012	Neonatal intensive care in Ankara Late preterm infants 34-36 weeks +6 who had RDS severe enough to be intubated and who received PPV in NICU.	3	3	4	4	2437 late preterm infants	Not clear	Not clear	1	6	34-36+6 weeks	Yes - "mortality" not clear up to what point.	24.7% mortality for infants receiving Surfactant therapy and 19.6% for those with RDS and 34.6% for those with non RDS lung disease	Yes - lung disease, ABGs, Resp support, PDA, sepsis, NEC, BPD, etc.	66.2% of those late preterm infants who had surfactant had RDS and 19.5% had congenital pneumonia as well as a number with other things. 77/2437 late preterms had surfactant.	No	N/A	No	N/A	Low
141	Wang et al 2012	55 NICUs in China. Major referral centres located in 24 provinces and municipalities. 20 general hospitals, 18 children's hospitals and 17 maternity hospitals. Infants with respiratory failure collected retrospectively.	3	3	4	4	6864 cases of respiratory failure	YES	Length of discharge	7 - Respiratory failure	6	<30 weeks	Mortality to discharge	Overall mortality with neonatal respiratory failure was 24.7%. In 48% of cases parents unable to afford high cost of treatment.	BPD, mean time in oxygen, length of hospital stay and pneumonia or sepsis	RDS in 43.9%, pneumonia/sepsis in 21.7% TTN in 8.1%	No	N/A	No	N/A	Moderate
152	Xiao-lu et al 2010	Seven NICUs in tertiary hospitals in the country Born >34 weeks, had RDS needing CPAP or mechanical ventilation	3	3	4	3	503 infants requiring hospital support	YES	During hospitalisation	1 - If 34-37 wks and needing resp support -	6	34-37 weeks	Early and late newborn (not clear) in hospital	In hospital mortality of severe respiratory distress group higher from SNAP II and ACORN respiratory score	ACORN respiratory score and SNAP II (neonatal illness severity score - lowest BP, lowest temp, p02/Fi02 ratio, lowest serum pH, seizures and urine output in 1st 12 hours)	Worse ACORN and SNAP scores in later preterms and those born by C/S	No	N/A	No	N/A	Moderate
102	Ozbek et al 2005	Hospital setting in Turkey Babies <37 weeks born between Feb 1996-Feb 1997	3	3	7	2	43 preterm, 36 term	Not clear	Average 58.9months	1	6	Separated into LWB and VLBW, term and preterm (<37 weeks)	No	N/A	No	N/A	No	N/A	Ankara Developmental Screening Inventory. Achenbach's Child Behaviour Check List.	Developmental delay was significantly higher and developmental levels were significantly poorer than control group. Preterm having significant delays in general development.	Moderate
106	Penalva et al 2005	Premature infant unit at HGIS- General Hospital de Itapecerica de Serra Preterm infants admitted to the premature infant unit at HGIS from Apr 1999-Apr 2002. Selected for study if they did not present perinatal or maternal risk factors for compromised development e.g. LGA, SGA, BPD, Malformations, genetic syndromes, asphyxia, meningitis, Grade II or IV IVH from USS.	3	3	7	4	296	YES	1 year	1	6	Preterm	No	N/A	Mechanical ventilation and oxygen therapy. Cranial ultrasound	Time spent on mechanical ventilation significantly shorter the older the GA. Abnormal cranial ultrasounds were associated with lower birth weight	No	N/A	Functional and descriptive categories for motor development.	Older GA reduced frequency of abnormal motor status. Cerebral palsy inversely related to GA. The lower the GA, the higher the frequency of abnormal motor status and motor development delay with statistical significance.	Low
117	Rothberg 1991	Neonatal care setting in Johannesburg Babies of <1700g and gestational age <34 weeks treated in the NICU.	3	3	7	1	80 (49 follow up until 6 years)	YES	6 years	4	6	<34 weeks	No	N/A	Developmental quotient (Griffiths), Presence or absence of soft neurological signs, school readiness, neuro exam	Children at high risk more likely to have CP and locomotor delay.	No	N/A	Yes - Griffiths	Children at high risk more likely to have lower locomotor scores.	Moderate
108	Pieper et al 2003	Tygerberg Children's Hospital Cape Town, South Africa. Medium care neonatal nursery ELBW babies (750-1200g or gest age 26-28 weeks who were denied access to NICU at Tygerberg hospital and who had clinical signs of RDS who required fractional aspiratory oxygen of more than 0.4	3	3	4 (but these babies denied access to NICU - on neonatal ward)	2	11 study, 10 controls	Not clear	To discharge	4	6	26-28 weeks, 750-1200g	No. of babies surviving to discharge, comparing those given CPAP and those not.	Giving CPAP to those who required it in neonatal ward increased survival rates in immature babies.	No	N/A	No	N/A	No	N/A	Moderate
135	Trotman et al 2008	University Hospital of West Indies Jamaica, urban Kingston and St. Andrew - neonates mainly inborn but some transferred All live inborn VLBW infants admitted Jan 2002-Dec 2003 from logbook	3	3	4 (ventilation for 3 babies)	4	4648	YES	2 years	2 - VLBW	6	All, 1000g and 30 weeks	Number of deaths in this time period recorded	56% of <30wks, 7% of >30wks died. 57% of <1000g, 14% of >1000g died. Survial for LBW much lower than developed countries	No	N/A	No	N/A	No	N/A	Moderate
161	Beken, S	Ankara University Hospital Level III Neonatal	3	4	4	1	80 neonates	Y	31 week ROP assessment and then again every two weeks.	1	6	<32 weeks	No	N/A	ROP, RDS, 02 therapy, number of RBC transfusion, number of hyperglycemic events,	ROP significantly lower in the group provided with fish oil TPN. only receiving fish-oil lipid emulsion in TPN de- creased the risk of ROP development [OR: 0.76, 95% CI (0.06–0.911), p = 0.04].	No	N/A	No	N/A	Good
164	Celik, I.	NICU of Zekai Tahir Burak Maternity Teaching Hospital, the biggest tertiary neonatology unit in Turkey, between June 2010 and May 2011	3	4	4	2	605 late preterm and 1477 term infants compared	Not clear	Not clear - ?to discharge	1	6	Late preterm 34-36 plus 6 vs term.	Yes - until discharge.	0.6% of late preterm deaths vs 0.2% of term births p<0.0001.	Yes - all very well defined. Includes respiratory distress, temperature instability, hypoglycaemia, jaundice, poor feeding, sepsis, polycythaemia, dehydration, or congenital anomalies	resp distress, jaundice, polycytemia, hypoglycaemia and feeding diff all sig increased in late preterm	No	N/A	No	N/A	Good
165	Chan et al 2013	NICU, Queen Mary Hospital, Hong Kong	3	4	4	4	79 premature infants	Not clear	Not clear - ?to discharge mean duration from birth to operation was 14.3 ± 7.9 weeks (range 0–56 weeks	3 prem and hernia	6	<37 wks. mean gestation age at birth was 31.9 ± 3.2 weeks (range 25–36)	Not clear	N/A	Yes - recurrence risk of repair needed, testicular atrophy	1 recurrence and no testicular atrophy	No	N/A	No	N/A	Low
170	Demirel G et al 2013	Tertiary NICU in Ankara, Turkey	3	4	4	1	278 infants	Y (not clear)	Not clear	4	6	<32 weeks (average 28 weeks)	Death at 7 days	Death equal in the two groups	Incidence of grade II NEC and culture proven sepsis	No differences between the two groups	No	N/A	No	N/A	Moderate
173	Erdemir, A et al 2014	Tertiary neonatal unit in Izmir Turkey	3	4	4	1	60 preterm infants	Y	Morbidity criteria in hospital	1 (but with RDS)	6	<32 weeks but average was 28.2 weeks	Mortality prior to discharge	Mortality higher in SIMV group but not statistically sig	Yes - duration of hospitalisation, repeated synacthen, mean tiem in SIPPV, mean extubn time, post extubation atelectatsis, PDA, IVH, BPD, Pneumothx	mean peak inflation pressure was higher in synchronized intermittent mandatory ventilation group (p < 0.001) and the mean airway pressure was higher in pressure support ventilation with volume guarantee group (p = 0.03), whereas mean tidal volume and respiratory rates were similar in both groups. The prevalence of postextubation atelectasis was higher in synchronized intermittent mandatory ventil…	No	N/A	No	N/A	Moderate
175	Hadi et al 2013	3 hospitals in Alexandria, Egypt.	3	4	4	4	152 infants	Not clear	Not clear	3 (prem and at risk"	6	<32 weeks (Mean 31 weeks)	No	N/A	method of ventilation (nasal continuous airway pressure or intermittent mechanical ventilation), packed red blood cell and/or plasma transfusion, occurrence of sepsis, neonatal indirect hyperbilirubinemia, intraventricular hemorrhage, and patent ductus arteriosus	52 had ROP of any stage (34.4%), and 27 (18%) had stage 1, five (3.3%) had stage 2, 17 (11.5%) had stage 3, and three (1.6%) had stage 4 disease all risk factors studied were found to be significantly associated with the development of ROP, except for neonatal indirect hyperbilirubinemia. Severity of ROP was inversely proportional to birth weight and gestational age.	No	N/a	No	N/A	Low
184	Mihajlovic, M et al 2013.	Neonatology unit of Belgrade Serbia	3	4	4	1	60 infants	Not clear	Unclear	3	6	Average gest 29 weeks	Yes - survival to discharge	No differences in death rates between the groups	Yes - poor treatment outcome	Poor treatment outcome affected by low birth weight (t=2.560, p=0.016), low Apgar scores (t=3.059, p=0.005), an ex- tended number of days on assisted ventilation (Z=4.404, p <0.001), presence of peripartum asphyxia (χ2 p=0.002) and cardio-respiratory arrest (χ2 =9.977, =12.804, p<0.001).	No	N/A	No	N/a	Low
185	Oncel, M et al 2014	Tertiary neonatal intensive care unit, Ankara	3	4	4	1	424 infants	Not clear	Hospital stay	1	6	Average of 28 weeks	Yes - 7 days "Death beyond the 7th day of life"	No differences between groups	NEC, NEC stage ≥2. Secondary outcomes were culture-proven sepsis, feeding intolerance, time to reach full enteral feeding and duration of hospitalisation. Adverse effects, including culture-proven sepsis attributable to L reuteri, flatulence and diarrhoea were also recorded.	frequency of culture-proven sepsis was significantly lower in probiotic group when compared to placebo group (RR 2.05; 95% CI 1.01 to 4.14; p=0.041), Feeding intolerance was significantly lower in infants exposed to probiotic when compared to placebo-exposed infants (28% vs 39.5%; p=0.015). Feeding intolerance periods of the infants in both groups were less than 72 h, and only 16 (8%) infants in …	No	N.A	No	N/A	Good
186	Ruiz-Peláez, J. G et al 2014	12 NIUS in Bogota	3	4	4	3	496 infants	Not clear	28 days or 56 days depending on gestation	1	6	Average of 31 weeks	Yes - death at 28 days	Neonatatal mortality was 80 out of 496	BPD - mild or mod to sever.	54.3% had BPD	No	N/A	No	N/A	Moderate
182	Ma X et al 2013	NICU, Bayi Childrens Hospital, Beijing	3	7	4	3	20 infants	Not clear	12-18 mo after operation	3 (IVH and prem)	6	<32 weeks	No	N/A	Yes - hydrocephalus and duration, VP shunt, ventriculostomy, ventricular size, secondary IVH	Hydrocephalus relieved in some with shunts put in - some still improved at 3 mo and some not.	No	N/A	No	N/A	Low
172	Eras et al 2013	Neonatal unit at teaching hospital in Ankara Turkey	3	7	7	1	102 infants	Y	18 and 24 months	3 (PDA and prem)	6	<32 weeks(27.5-28.2 weeks average)	No	N/A	Yes - RDS, NEC, Sepsis, Pneumothorax, IVH, CLD and ROP all measured in two groups	RDS in 20% of infants, NEC in one infant only, Sepsis in 76%, IVH in 7-20% (?sig??), CLD in 30% and ROP in 56-77%	No	N/A	Yes - physical exam, neurological exam, ophthalmological exam and audiology, BSID II MDI and PDI	No differences in MDI, PDI, rate of CP or sensory impairment	Moderate
197	Xia, H. et al 2014	11 NICUs in China during 2009-2011 - 4 provinces - Northern, Southern, local, coastal inborn and infants transferred included	3	7	7	4	223 patients	Y	Until discharge	3	6	All but average 31.4 weeks	Mortality to discharge.	19.3% of infants	Not really but intracranial abscess, endopthalmitis, length of hospital stay, length of antifungal treatment.	N/A	No	N/A	No	N/A	Low
56	Gezer et al 2013	Istanbul University Pregnancies with PPROM followed up in clinic.	3	6 (clinic follow up of PPROM patients)	4	4	228 babies	Not clear	Not clear	7 - Pregnancies with PPROM	6	28-33 weeks	Yes - "Neonatal mortality" not defined within months, in hosp rate?	Neonatal mortality 17.5% in hospital with PPROM <24 hours vs >48 hours increasing risk of mortality. Morality higher for each gest week where Prom present. If PPROM <28 weeks, mortality 53% whereas at >33 weeks, mortality 3.4%.	Yes - RDS, Sepsis, IVH, NEC, NICU requirement and PPV requirement	PPROM gest occurring associated with neonatal complications of RDS, sepsis, IVH, NEC	No	N/A	No	N/A	Low
19	Behjati et al 2011	Paediatric neurosurgery department of Children's hospital medical centre in Tehran, Iran. Children with IVH who were followed up for more than 6 months seen in the neurosurgical clinic or NICU.	3	6 (clinics)	4	4	97	Not clear	>6 mo (all but 3 to 1 year)	7	6	All	No	N/A	Yes - signs of ICP, increase of HC more than 2cm per week, recurrent vomiting, crisis of apnea, bradycardia or decreased level of consciousness, cranial USS findings	35% required VP shunting, prematurity was a risk factor for shunting.	No	N/A	No	N/A	Low
18	Bartlett et al 1991	Traditional rural indigenous community of Guatemala - 10,000 inhabitants almost all who are Cakchiquel Maya Indians with INCAP surveys showing that 82% of male heads of households were farmers. All infants born between 1 Oct 1988-20 Sep 1989 in community of Santa Maria de Jesus, Sacatepiequez, Guatemala. Pregnant women identified during pregnancy through community midwives and families as well as…	3	1.2	1	3	380 infants born and survived birth and the first day of life and 327 accepted participation in the study.	Not clear	3months	5	8	All	Duration of study	Preterm significantly greater risk of mortality than LBW (LBW significantly higher than normal BW). No preterm survived the 3 months	Diagnosed through routine and additional clinical visits and parent orientated to detection of key symptoms	Premature infants had a relative risk of lethal and potentially lethal illness of 11.1 compared to normal term infants.	No	N/A	No	N/A	Moderate
63	Gray et al 1991	Three hospitals and two maternity clinics in city of Natal, North Eastern Brazil. Facilities provide obstetric care for 78% of institutional deliveries and 90.2% of births to city residents take place here. All singleton live births to permanent residents of Natal in five study institutions	3	2.5	5	2	11171 live singleton births	NO	Unclear	5	8	<2500g	Early neonatal death	Early neonatal mortality rate 25.5 per 1000 live births, 75% of early neonatal deaths were premature low birthweight infants and the mortality rates were 591 and 318 per 1000 respectively, for preterm small for gestational age and preterm appropriate for gestation age. Mortality was 50 per 1000 for term LBW and 8.6 for term normal birthweight AGA infants.	No	N/A	No	N/A	No	N/A	Moderate
110	Porto et al 2011	Instituto de Medicina Integral Prof Fernando Figueira Recife North East Brazil Pregnant women receiving care at the institute if they were 34-36 weeks gestation and at risk of imminent premature delivery.	3	2.2	4	1	320	NO	During hospitalisation	1	9	34-36 weeks - (LMP and USS - date of LMP if known and reliable or by USS before 20 weeks pregnancy)	Not clear - early and late newborn? In hospital	Mortality in hospital	Apgar scores at 1/5 mins, exogenous surfactant, ventilatory support, admission to ICU, hypoglycaemia, jaundice, neonatal sepsis,	No reduction in respiratory morbidity with steroids or with morbidity.	No	N/A	No	N/A	Low
121	Sangkomkamhang et al 2011	Nine hospitals in four far eastern countries including Thailand, Malaysia, Indonesia and Philippines Pregnant women from hospital in Jun 2007-Dec 2008	3	2.2	5	3	765	Not clear	Hospital stay	5	9	<37 weeks (LMP or early USS)	Early neonatal death	Early neonatal death not statistically different between C/S and vaginal delivery.	RDS, apgar at 5min <7 (birth asphyxia), length or hospital stay	Infants born by C/S had longer hospital stay. Risk of RDS, birth asphyxia same in two groups	No	N/A	No	N/A	Low
66	Hall 2003	Tertiary centre - Tygerberg Hospital and Steelenbosch University All women with singleton pregnancies presenting with early onset > 24 - <34 weeks and severe eclampsia where both mother and fetus are otherwise stable.	3	2.3	7	3	334	NO	To discharge	1	9	28-34 weeks (LMP and USS)	Neonatal/Infant deaths before discharge	Survival rate increased with increasing GA	Admission to NICU as a predictor	Neonatal outcomes improved with GA although not significantly.	No	N/A	No	N/A	Low
49	Ertan et al 2012	Saarland University Medical School Preterm infants born in labour and delivery unit with absent end diastolic flow or not.	3	2.4	4	2	73 fetuses	NO	2-3 years	1	9	26-36 weeks (USS or LMP)	No	N/A	Yes - RDS, mech vent %, and days, IVH grade III or IV, ROP %, NICU admission %, duration of hospitalisation	Higher no of days on mechanical ventilation, ROP and admissions for control group.	No	N/A	Yes - Munich functional developmental diagnostics (gross motor and find motor skills, perception, active speech, comprehension of speech, age of social interaction and independence	No of children with MFDD deficiencies higher in the study group, statistically significant in perception, active speech and comprehension.	Low
126	Sekhavat et al 2011	Obstetrics department, Said Sough Hospital University Referral Centre Women undergoing delivery of babies from 28-34 weeks who had a complete course of antenatal corticosteroids.	3	2.4	4	3	104 mothers	NO	Not clear	1	9	28-34 weeks - (LMP and/or USS in early pregnancy)	No	N/A	Yes - need for resuscitation and ventilation >24 hours	Infants delivering less than 2 days of corticosteroid exposure have a higher frequency of need for resus and vent than if delivered later.	No	N/A	No	N/A	Moderate
2	Abu-Salah et al 2011	Queen Alia Hospital in Amman Jordan All singleton births born in hospital 2009-2010	3	2.4	7	4	2904 infants with 348 preterms and 253 late preterms	NO	Hosp stay	5	9	All but preterms defined as <37 and late preterm as 34 - 36 +6/7 - (LMP and/or USS)	No	N/A	Yes - RDS, hypoglycaemia, evaluation for sepsis, feeding difficulties, phototherapy	Late preterm significantly increased risk of all morbidities	No	N/A	No	N/A	Moderate
98	Nkyekyer et al 2006	Department of Obs and Gynaecology, Korle Bu Teaching Hospital Preterm births from 1 Jul-31 Dec 2003	3	2.5	7	2	440	NO	Not clear	1	9	<37 weeks (Ballard, LMP and USS)	Perinatal mortality rate	Significantly higher in indicated preterm birth group	Antenatal period occurrence of antepartum complications noted. Duration and outcome of NICU.	Greater morbidity in indicated preterm birth.	No	N/A	No	N/A	Low
12	Ballot et al 2010	Retrospective review of 474 babies admitted within 24 hours of birth between July 2006 and 30 June 2007 to the neonatal unit, Charlotte Maxeke Johannesburg Academic Hospital. Includes all neonates admitted to labour ward nursery who may of died shortly after birth. VLBW babies delivered at outlying primary level hospitals or clinics and those born before arrival in hospital and then admitted were…	3	3	4	4	474	Not clear	to discharge?	6	9	<1501g (USS and LMP and Dubowitz)	Number of recorded deaths	Birth weight of survivors significantly greater than deaths. Most common cause of death was extreme multi-organ immaturity.	No	N/A	No	N/A	No	N/A	Low
46	Duman et al 2003	Dokuz Eylul University Faculty of Medicine Turkey All live born infants born in hospital with birth weight less than 1500g and infants born elsewhere who were admitted within 7 days of birth.	3	3	4	3	173 infants over 5 years	YES	120 days after birth at discharge or death	2	9	Mean of 29.8 weeks (23-36 weeks) - LMP, standard obstetric parameters and USS and the new Ballard exam used when maternal and obstetric data for determination of dates not actually known.	Yes - Not clear at what stage...	100% mortality if 23 wks, 73% mortality if 24-25 wks, 40% mortality if 26-27 wks, 14% for those born at 28-31 wks and 4% for >32 wks,	No - not for prems	N/A	No	N/A	No	N/A	Low
58	Gharehbaghi et al 2012	NICU of AlZahara Teaching Hospital, Tabriz Iran Consecutive preterm infants <32 weeks and <1500g admitted to NICU	3	3	4	1	108	Not clear	28 days	1	9	<32 weeks-LMP and first of second trimester USS when available. Confirmed by Ballard assessment			RDS, need for supp oxygen, development of BPD by 28 days and	Azithromycin statistically significant effect on number of patients with BPD at 28 days and number on 2 at 36 weeks post menstrual age	No	N/A	No	N/A	Moderate
67	Ho et al 2007	NNU of main referral centre for the State of Perak, Malaysia with a population of over two million. All babies of birth weight 1500g or less at birth admitted to the NICU between Jan and June in 1993 and 2003.	3	3	4	2	69 in 1993 and 60 in 2003	NO	Not clear	2	9	VLBW infants (not clear how measured) - (LMP and USS sometimes and Ballard)	Yes - not clear on mortality measured, hospital mortality?	Significant increase in survival in 2003 from 69% to 81% and also in ventilated babies (53 % to 93%) also significant increase in survival in those <28 weeks and those over 28 weeks (p=0.04)	RDS, apnoea, pneumothorax, NIC, hypotension and oxygen dependency for first 28 days of age, culture proven infection, duration of stay	Increase in RDS in babies from 1993 to 2003. No difference in pneumotx, NEC, hypotension and oxygen dependency. Significant reduction in infection.	No	N/A	No	N/A	Low
138	Velaphi et al 2005	Baragwanath Hospital - only public sector maternity and neonatal services for Soweto and surrounding areas with network of seven maternity clinics. 2-3 million with 30-35,000 infants born annually almost all black. Number of home deliveries. Live births weighting between 500g and 1499g from Jan 2000-Dec 2002.	3	3	4	4	2164	Not clear	To discharge	2 - 500-1500g	9	500g-1499g - (obstetric assessment based on dates, clinical examination and occasionally USS) or modified Ballard score then a combined assessment done	Survival rate	Survival rate increased with increasing GA.	No	N/A	No	N/A	No	N/A	Low
146	Wilkinson at al 1999	Neonatal Nursery of Hlabisa Hospital, KwaZulu-Natal. 149 consecutive admissions to the neonatal unit audited.	3	3	7	3	144	Not clear	To discharge?	6	SPLEN score	<2.5kg and significantly preterm (determined by midwife)	Neonatal deaths and cause using perinatal problem identification programme	Risk of death increased substantially as SPLEN score went down	Considered type of critical events	Most critical events were more common among premature and LBW	No	N/A	No	N/A	Low
174	Fortes Filho J et al 2013	Tertiary neonatal unit in Southern Brazil	3	4	4	3	157 infants	Y	"during entire observational period"	2	5	28.3 weeks (range 24– 32 weeks), respectively	No	N/A	the occurrence of surfactant, indomethacin, blood transfusions and erythropoietin therapies, occurrence of sepsis, meningitis, all stages of intraventricular hemorrhage (IVH) and persistent ductus arteriosus (PDA). Sepsis, meningitis and IVH were diagnosed by clinical examination, microbiological culture and cranial ultrasound, respectively. The diagnosis of clinical sepsis was based on the occur…	99 patients (63.1%) developed clinical sepsis, 91 pa- tients (58.0%) used oxygen therapy in mechanical ventilation, 89 patients (56.7%) received surfactant, 88 patients (56.1%) received erythropoietin, 49 pa- tients (31.2%) developed any stage of IVH (15 pa- tients with stages 3 or 4 of IVH) and 23 patients (14.6%) developed PDA. . Seventeen patients (10.8%) de- veloped stage 1 of ROP, and 21 pat…	patient’s weight measured at completion of sixth week of life	The mean weight of the entire cohort at completion of the sixth week of life was 1339.7279.14 g	No	N/A	Moderate
75	Kilic et al 2006	Ondokuz Mayis University Faculty of Medicine NICU All preterm twins followed in the NICU between Jan 2003-Mar 2005	3	3	4	4	136	YES	To discharge?	1 - and twins	6	Preterm only	No	N/A	List of defined morbidities	More common in SGA than AGA but no association with birth weight discordance.	Rate of discordant growth	Higher in preterm than term twins	No	N/A	Low
93	Mokhachane et al 2005	Chris Hani Barangwath Hospital - public hospital serving population of Soweto If admitted to a "low care ward"- had to be well, not requiring oxygen or IV fluids, weighing <1.6 kg, feeding adequately, etc.	3	3	7	1	120	NO	3 months	6	1	LBW below 1800g	Post discharge mortality rate	Unclear appears to be no difference	Hospital re-admissions	No difference between early discharge group and routine discharge group	Weight gain	Statistically significant better weight gain in routine discharge group	No	N/A	High
177	Karagol, BS et al 2013	NICU in Ankara, Turkey	3	4	4	1	124 neonates	N	Until full feeds met	1	6	Mean gest age 28 weeks	Mortality to discharge	No significant differences in the groups 4 in one group (9%) and 3 (7%) in another group	hours of life enteral feeds were started, DOL that parenteral nutrition (PN) was started, total days of PN administra- tion, DOL to 80 mL/kg/d enteral feeds, NEC (Bell’s stage 2 or greater)12 and culture-proven late-onset sepsis, defined as the association of clinical signs and positive cultures obtained from blood, cerebrospinal fluid, and urine (at ≥3 days of age). Other clinical outcomes exami…	Neonates in the rapid-feeding advancement group achieved full enteral volume of feedings earlier than the slower advancement group. They received significantly fewer days of PN, incidence of NEC and the number of episodes of feed intolerance were not significantly different (Table 2). The inci- dence of culture-proven late-onset sepsis was significantly less in infants receiving rapid-feeding adv…	weight, height, head circumference	Rapid feeding group regained birth weight quicker. rates of extrauterine growth restriction or weight less than the 10th percentile for gestational age on the Fenton curve11 were significantly reduced in the rapid- feeding advancement group at 28 days of age (26% vs 38%, P = .03) and at hospital discharge (17% vs 31%, P = .02)	No	N/A	High
82	Larios Del Toro et al 2012	Tertiary referral centre in Mexico Preterm VLBW <1500g	3	3	7	2	114	Not clear	30 days	4	6	Mean 31 weeks	Yes - died during study - 1st 30 days	8.9% died during the study.	Yes - RDS, GI disorders, infection or sepsis, haematological alterations, metabolic disorders, congenital cardiopathies, ROP, congenital malformation	Frequent pathologies seen included respiratory diseases, infection and sepsis and metabolic disturbances	Yes - birth weight, birth height, OTC, MUAC, thigh measurements and WAZ, LAZ and WLZ taken	Percentage of prems with a WAZ <-2 increased from 44-67% with no changes afterwards, the indicator MUAC increased at 7 days from 23-49% at 15 days and at 30 days. May indicate early growth failure	No	N/A	Moderate
72	Kelekci et al 2011	Dermatology and gynae outpatients at Sachem Practice Centre at nominee education and research hospital in Turkey Porous women	3	6 (clinics)	5	4	1231 term and 105 preterm	Not clear	As pregnant women average age 28 yrs	7 - women pregnant	6	Not clear	No	N/A	Yes - striae distensae	Striae distensae significantly more common in prematurely born women 49% vs 31%	Yes - birth weight, birth length	Not significantly different	No	N/A	Moderate
122	Santos et al 2009	Pelotas - city in the South of Brazil, More than 90% of deliveries take place in hospitals and 93% of women receive antenatal care. Three private non-profit hospitals with a fourth indigent patient hospital - Catholic run. Preterm births of 34/0 to 36/6 weeks of gestational age	3	1.3	5 (community but not clear what hospital facilities available)	2	3285 live births	NO	24 months	1 - All late preterms	3	34-37 vs >37 weeks (but if LMP unclear or birthweight, length and head circumference inconsistent with normal curves for gestational age or if date of LMP unknown then gest ages determined using Dubowitz score	No	N/A	Yes - breastfeeding duration, prevalence of wheezing and hospitalisations, pneumonia	Increased wheezing and hospitalisations up to 12 months in late preterms. Increased pneumonia and hospitalisation up to 24 months in late preterm children	Yes - birth weight, birth length, weight gain, WAZ, HAZ and WHZ at 12 and 24 month	Risk of being underweight (adjusted OR) and stunted remained statistically significant at 24 month but no significant difference between two groups with being wasted.	No	N/A	Moderate
77	Korkmaz et al 2011	Hacettepe University, Ankara, Turkey All preterms with gest ages between 28-34 weeks	3	3	4	2	93 preterm infants	Not clear	Not clear	1	4	28-34 weeks	No	N/A	Yes - duration of mech ventilation, supplemental oxygen therapy, time to full enteral nutrition, total parental nutrition and hospitalisation durations, hypoglycaemia, plycythemia, RDS, feeding intolerance, NEC, IVH, BPD, ROP	Incidences of hypoglycaemia, plycythemia, feeding intolerance and NEC significantly higher in preterm infants with fetal malnutrition.	Yes - birth weight, birth weight and OFC at birth	Mean birth weight, length and head circumference of preterm infants with fetal malnutrition were significantly lower than in well nourished preterm infants	No	N/A	Moderate
40	Cooper et al 1997	Baragwanath Hospital - only public sector maternity and neonatal services for Soweto and surrounding areas with network of seven maternity clinics. 2-3 million with 30-35,000 infants born annually almost all black. Number of home deliveries - very representative of region. Infants with BW <1500 surviving to hospital discharge then stratified into 3 groups - those 1-1.5 kg who required mechanical …	3	3	4	2	677 infants of LBW in 3 groups <1000g, 1-1.5 kg vent and 1-1.5 kg non vent	YES	1 year CGA	2	1	Average of 28 to 32 weeks but not clear	Yes - period between hospital discharge and 1 year CGA	Yes - mortality rates high in these groups of neonates (12-14%)	Yes - Cerebral palsy and PVL (measured with USS)	Higher rates of CP and PVL in the <1000g group	Yes - birth weight, length, OFC at birth and at 3, 6 and 12 months	Yes - no major differences between the groups by 13 months	Yes - Bayley Scales of Infant Development, hearing screening, vision (squint), ROP	Yes - ANOVA showed differences between them but not when Bonferreni calculation placed on.	Moderate
156	Zhang et al 2009	Tongliang County Hospital (SB not included) Children born to non-smoking women who gave birth in hospital. Only healthy mothers included.	3	2.4	5	2	157 maternal neonatal pairs	YES	2 years	3	9	Not clear - LMP and USS	No	N/A	Yes - cord vitamin A, vitamin A placental transport ration, cord vitamin E level and cord vitamin C level and placental transport ration for each	Not analysed in terms of prematurity	Yes - birthweight, birth length, birth OFC	Association between birth weight length and OFC and gestational age	Yes - Gesell developmental scales for 0-3 yrs revised by Chinese pediatric association and Beijing mental development cooperative group.	Not analysed for prematurity	Low
119	Sallakh-Niknezhad et al 2012	Alzahara NICU referral and training centre in Azerbaijan province of Iran All infants receiving trophic feeding	3	3	7	2	170 preterm infants	YES	Hospital stay	4	9	26-31 weeks (LMP and Early USS)	No	N/A	Yes - duration of parental nutrition, hospital stay, episodes of sepsis, NEC, vomiting, other signs of feeding intolerance including bile or blood stained residuals, melena, diarrhoea, no stool more than 24 hours, bowel distension, apnoea, days of feeding gstop, days to complete enteral feeding	Infants with early enteral feeding were discharged sooner than infants who received trophic feeding, iv catheters of parneteral nutrition were in more days in infants in the late feeding group but no increase in late onset sepsis. No differences in feeding tolerance.	Yes - daily weight	Time to gain birth weight significantly shorter in early versus late feeding group	No	N/A	Low
26	Can et al 2012	Sisli Children's Hospital Turkey Preterms born between 27-33 weeks who were AGA.	3	3	4	1	53 infants	Not clear	40 wks gest	1	5	27-33 weeks (either from LMP or estimated from Ballard)	No	N/A	Yes - BPD defined as the need for oxygen at 36 weeks of postmenstrual age, NEC defined using Bell's classification as stage II or more, PDA diagnosed on echo and needing treatment, IVH grade II or higher using Papile classification, CPVL from cranial USS, ROP, serum levels of IGF-1, IGF binding protein and TFTs	Serum IGF-1 And IGFBP3 statistically higher in those receiving aggressive PN	Yes - height, weight and OFC	Anthropometric measurements - height and OFC higher in group receiving aggressive PN.	No	N/A	Moderate
30	Charpak et al 2001	Clinica San Pedro Claver (Columbian Social Security Referral Hospital) All live born infants who weighed <2000g who were eligible for KMC and whose mother would comply with follow up.	3	2.5	7	1	13,560 live infants delivered, 1084 <2000g assessed but 307 ineligible because they had died or had exclusion criteria , 777 were randomised to one of two interventions and 31 further had exclusion criteria with 746 remaining in study.	YES	1 year	2	7	If <1200g at median postnatal age of 33 days or those older up to 2kg if median postnatal ages were between 1-19 days	Mortality at 1 year	Mortality (cumulative) 4.3% in KMC group and 5.5% in control. Used corrected gestational age.	Length of hospital stay, incidence of infection (requiring hospital treatment, incidence of severe nosocomial infections proportion of infants breast fed	If given KMC, spent less time in hospital than those given standard care. Severity of infections less and more infants breastfed.	Yes - OFC, weight, height	OFC increased in KMC group	Yes - Griffiths validated for Colombia	Similar development in 2 groups	Low
15	Barros et al 2012	Pelotas Brazil All hospital deliveries in the city in 1982, 1993 and 2004.	3	1.3	5	3	15777	Not clear	12 and 48 mo	5	3	All	IMR and NMR	If <34 wks increased mortality, NMR168/100 at <34 wks, 19/1000 at 34-36 wks and 11/1000 37 wks, 8/1000 38 wks, 4/1000 39-41 wks and 9/1000 at 42 wks, IMR 189/1000 at <34 wks, 40/1000 at 34-36 wks, 23/1000 at 37 wks, 14/1000 at 38 wks, 10/1000 at 39-41 wks and 17/1000 at 42 wks.	Total breastfeeding mothers, hospitalisation.	If <34 weeks, breastfed for shorter periods.	Yes - WAZ, HAZ, WHZ at 12 and 48 months	WAZ and HAZ at 12 month significantly different between the groups, not at 48 month	No	N/A	Low
89	Mardanian et al 2011	Perinatal centre in Iran All deliveries over a certain time	3	3	4		1402 deliveries	Not clear		5	6		Yes - mortality in neonatal unit	25% of all died							Low
25	Burger et al 2011	Tygerberg Children's Hospital Cape Town, South Africa Infants born <1250 g between Jan-Dec 2004 and admitted to the level 2 neonatal ward or the NICU.	3	3	4	3	121 eligible for study with four dying before follow up, one lost to follow up and one had congestive heart failure	Not clear	12 months	2	7	1250 (27-36 weeks)	No	N/A	Fidgety movements	91% fidgety movements in all prems			GMFCS, Peabody Developmental motor scale, Alberta infant motor scale, Amiel Tison, Goselin neuro exam	12% infants below average (80-89)on motor outcome, 3% infants poor (70-79%), 4% infants very poor (35-69) PMDS, AIMS - 19% below 5th centile. Amiel-Tison and Gosselin - 5% suspect outcome, 9 infants (8%) abnormal. TOTAL (PDMS-2, AIMS and neuro assessment = 4% suspect, 8% cerebral plasy	Moderate
17	Barros et al 2011	Maternity Hospital Mario de Moraes Altenfelder Silva - a third level city owned hospital of Sao Paulo, Brazil. Neonates were included if they had signed maternal informed consent, were from adolescent mothers aged 10-19 years, were term newborn infants or late preterm infants.	3	2.5	5	2	36 late preterm, 96 term (3685 babies born in hospital, 928 had teenage mums, 183 had gestational age of 40 weeks and 88 were late preterm, 139 of these were excluded leaving 96(52%) 40 weeks and 36(26%) late preterms	YES	24-72hr	1	9	34-36 weeks - (USS and/or LMP), Ballard when no obstetric data available.	No	N/A	Neonatal intensive care unit network neurobehavioral scale	Lower scores on NNNS in prems					Moderate
61	Gonzalez et al 2006	National database from Chilean Ministry of Child Health Dept of Statistics, (not clear whether SB including) All births from 1990-2000	4	1.3	5	7 Descriptive analysis	29.4 million	YES	Neonatal period?	5	6	All	Neonatal mortality rate and birth weight and GA specific neonatal mortality rate.	Large reduction over the 10 years in <1500g and 32 weeks NMR	No	N/A	No	N/A	No	N/A	Low
90	Marshall et al 2005 (Grupo Colaborativo NEOCOSUR)	Sixteen Neonatal del Cono Sur Network participating centres from Argentina, Chile, Paraguay, Peru and Uruguay All infants with birth weight 500-1500g from Oct 2000-May 2003	4	3	4	3	1801 infants	YES	Not clear	2	6	Mean gestational age was 29 weeks (all 500-1500g infants)	Yes - not clear	Gestational age of survivors was older than not survivors, gestation associated with mortality	No	N/A	No	N/A	No	N/A	Low
59	Gilbert et al 2005	Various settings where screening of ROP takes place including Latin America and others Any information on screening for ROP on infants seen during the last 1-2 years.	4	3	5	4	Various	Not clear	Not clear	4 - Babies fulfilling screening criteria for rope including birth weight and gab but also other	6	Variable <36 weeks -Mean of two estimates based on dating time of LMP - one obtained by asking women enrolled in mid pregnancy and the second asked at the birth of the live born infant.	No	N/A	No	N/A	No	N/A	ROP	Mean birth weights for those with severe ROP are higher in moderately and poorly developed countries. Mean GA values of infants with severe ROP exceeded those recommended for screening (<32 weeks). Many were older than this up to 38 wks.	Moderate
194	Stein, A. D et al 2013	Variable - 5 areas (community studies)	4	1	5	3	4518 participants	Not clear	15 years	3	3	Not clear <37 weeks	No	N/A	Yes - BP in adulthood, fasting blood samples	No differences seen.	Yes - height and weight, HAZ and BMI	Adults born preterm were 1.11 cm shorter (95% CI, 0.57-1.65 cm), and those born term but SGA were 2.35cm shorter (95%CI, 1.93-2.77 cm) compared with those born at term and appropriate size for gestational age	Yes - highest grade of schooling completed - Schooling was classified as completion of secondary school (based on site-specific criteria: completion of 12th grade in Brazil, India, and South Africa; 11th grade in Guatemala; and 10th grade in the Philippines) or not	Compared with those born term and at appropriate size for gestational age, schooling attainment was 0.44 years lower (95% CI, 0.17-0.71 years) in those born pretermand0.41 years lower(95%CI, 0.20-0.62years) in those born term but SGA	Good
			1 = Low income	1.1 - Popn ANC	SCBU or neonatal unit or community sample	1 - RCT				1 - Prem	1 - Ballard
			2 - Low middle income	1.2 Popn community (home based antenatal clinics)	1 - Community	2 - Prospective cohort study with comparison group				2 - Birth weight	2 - Dubowitz
			3 - Upper middle income	1.3 - Popn postnatal ward	2 - Facility based without SCBU	3 - Prospective cohort study (no comparison)				3 - Other	3 - LMP
			4 - Other	2 - Facility based	3 - SCBU w/o ventilation	4 - Retrospective cohort				4 - Both prem and LBW	4 - USS
				3 - NNU of some type							10 - Fundal height
				2. - Community ANC recruitment	4 - SCBU with ventiln	5 - Review				5 - All births	5 - Combination without USS
				2.2 - Hospital ANC recruitment	5 - Not clear	6 -Systematic review				6 - All babies either entering or being discharged from a SCBU/NICU	6 - Unclear
				2.3 - Antenatal ward recruitment	6 - Other	7 - Other				7 - Other (specific)	7 - Birth weight
				2.4 - Labour ward recruitment	7 - NICU (ventilation not specified)						8 - Capurro score
				2.5 - Post natal ward recruitment	8 - Mixed						9 - Combo with USS
				4 - Mixed settings

## Sheet: Sheet2
Ades V 2013	Village in Uganda, 77% of deliveries in hospital but some outside hospital in community	HIV infected women in Torotoro Uganda who were ART naïve.		6	Uganda	5	1	y	28 days	342 HIV infected women and 351 live born infants	3	5	All gest ages - median gest age 38.9	Yes - PNM at 7 days and NMR at 28 days	If born preterm, unadjusted OR of 12.7 (3.8 - 42.7). No adjusted OR. 7 out of 13 infants who died in the first 28 days were prem (<32 wks.). Increased GA was associated with decreased OR of death 0.45 (0.2-0.9)	No	N/a	No	N/A	No	N/A	Good	RCT of use of ARVs
Adinma E et al 2013	Nnamdi Azikiwe University Teaching Hospital over 10 yrs 2000-2010	Patients treated for eclampsia (those who had registered for antenatal care at NAUTH and referrals, with generalized tonic- clonic seizures during pregnancy and within the puerperium)	Patients with seizures for other reasons	2	Nigeria	5	4	n	Perinatal period	57 women with preeclampsia	3 preeclamptic women	6	up to term	Yes - labelled as PNMR but not defined in the article	25.5% of deaths were due to prematurity, 12/13 deaths were in babies less than 37 weeks	No	N/A	No	N/A	No	Na	Low	Retrospective case cohort
Ali, A et al 2013	Neonatal unit, Hyderadbad, Pakistan	All neonates admitted to the Aga Khan Maternal Child Care Centre (neonates requiring surgery or mechanical ventilation are referred to tertiary unit)	Those with tetanus and those ?referred to tertiary centre	3	Pakistan	4	4 (audit of all patients in 2009)	y	Not clear	1554 neonates	3 (all neonates admitted)	6	All gest ages	Death in neonatal period - not clear.	56/106 neonates died due to prematurity	No	N/a	No	N/A	No	N/A	Low	Retrospective audit.
Al-Riyami, N	January 2006 to December 2011 at Sultan Qaboos University	Women with PPROM presenting to unit	If >26 weeks gest, other causes of prem or multiple gest	2	Oman	4	4	N	Not clear	44 neonates	3 (PPROM <26 wks.)	5	mean gest age 29 weeks (/17 - 40 wks.)	Within 24 hours of delivery PNMR	20% miscarried, 9% stillbirth, 16% died within 24 hours	Yes - neonatal sepsis, RDS and hernias	Yes - percentage of each given but really small numbers	No	N/A	No	N/A	Low	Retrospective audit.
Beken, S	Ankara University Hospital Level III Neonatal	All preterm infants admitted <32 weeks to NICU Jan- Dec 2013	Major congenital anomalies, congenital infections and metabolic disorders excluded	4	Turkey	4	1	Y	31 week ROP assessment and then again every two weeks.	80 neonates	1	6	<32 weeks	No	N/A	ROP, RDS, 02 therapy, number of RBC transfusion, number of hyperglycemic events,	ROP significantly lower in the group provided with fish oil TPN. only receiving fish-oil lipid emulsion in TPN de- creased the risk of ROP development [OR: 0.76, 95% CI (0.06–0.911), p = 0.04].	No	N/A	No	N/A	Good	RCT of use of fish oil in TPN. Well blinded.
Hamouda, B	Paediatric unit of pedia- tric unit of Tahar Sfar Hospital in Mahdia, Tunisia, between January 1996 and December 2010.	infants less than	Not clear	6	Tunisia	5	4	Not clear	Unclear	44 cases	3	6	All infants	Yes - mortality from meningitis at any age	The mortality rate was 15.9 % and risk of death in prem group (<37 wks.) was significant and the rate of neurological	Yes - neonatal meningitis.	Not specific for prematurity	No	N/A	No	N/A	Low	Retrospective case review with limited data on prems
Bucens, I.	East Timor neonatal patient registers 2008-2010.	All neonates admitted to the level II unit	Not clear	3	East Timor	3	4	Y	To discharge	2288 infants admitted	3	5	All infants	Yes - deaths in neonates at any time	28.5 % of the deaths were due to prematurity (11% of all cases admitted) with a case fatality rate of 30.6. Unadjusted OR of death in prems 5.64 (3.87-8.20) p,0.000, Adjusted OR = 0.95 (0.39-2.29) p=0.81.	Yes	Not specific for prematurity but measured RDS, asphyxia, jaundice based on a thematic analysis of the commonly indicated diagnoses, one of only seven discharge diagnoses were allocated by IKB to each child. These were asphyxia, infection, jaundice, prematurity, congenital, respira- tory disease and ‘other	No	N/A	No	N/A	Low	Retrospective case review with only limited data on prems
Celik, I.	NICU of Zekai Tahir Burak Maternity Teaching Hospital, the biggest tertiary neonatology unit in Turkey, between June 2010 and May 2011	Neonates born at 340/7 through 36+6/7 weeks gestation and admitted. Term infants (370/7–416/7 gestational weeks) who had respira- temperature instability, hypoglycaemia, tory distress, jaundice, poor feeding, sepsis, polycythaemia, dehydration, or congenital anomalies were recruited for comparison of morbidity and other findings with late preterm infants. to the NICU for any reason were eligible …	Not mentioned	4	Turkey	4	2	Not clear	Not clear - ?to discharge	605 late preterm and 1477 term infants compared	1	6	Late preterm 34-36 plus 6 vs term.	Yes - until discharge.	0.6% of late preterm deaths vs 0.2% of term births p<0.0001.	Yes - all very well defined. Includes respiratory distress, temperature instability, hypoglycaemia, jaundice, poor feeding, sepsis, polycythaemia, dehydration, or congenital anomalies	resp distress, jaundice, polycytemia, hypoglycaemia and feeding diff all sig increased in late preterm	No	N/A	No	N/A	Good	Prospective case cohort study.
Chan et al 2013	NICU, Queen Mary Hospital, Hong Kong	Premature infants having inguinal hernia repair	Not clear	4	Hong Kong, China	4	4	Not clear	Not clear - ?to discharge mean duration from birth to operation was 14.3 ± 7.9 weeks (range 0–56 weeks	79 premature infants	3 prem and hernia	6	<37 wks. mean gestation age at birth was 31.9 ± 3.2 weeks (range 25–36)	Not clear	N/A	Yes - recurrence risk of repair needed, testicular atrophy	1 recurrence and no testicular atrophy	No	N/A	No	N/A	Low	Retrospective case review
Chen, L. et al 2013	National Taiwan University Hospital, Mackay Memorial Hospital and the Branch for Women and Children at Taipei City Hospital in Taiwan during the period of 2006 to 2008	birth weightb1500 g; [2] gestational ageb37 weeks; [3] admission to the hospital within the first seven days of life; [4] singleton birth or the first child in a set of twins or multiples; [5] physiologically stable, i.e., no ventilator use, absence of apnoea, bradycardia, or desaturation with or without oxygen use at post-menstrual age (PMA) of 36 weeks; [6] hospital discharge prior to PMA of 44…	congenital anomalies or severe neonatal diseases (i.e., seizures, hydrocephalus, ventriculoperitoneal shunt, periventricular leukomalacia [PVL], grade III–IV intraventricular hemorrhage [IVH] [9], NEC with colostomy and stage IV–V retinopathy of prematurity [ROP])	4	Taiwan	4	1	Y	"When infants approached term age"	178 infants	4	6	<37 weeks (Mean - 29-30 weeks)	No - excluded if had died	N/A	length of hospital stay, duration of respiratory support (i.e., ventilation, continuous positive airway pressure[CPAP] and oxygen use), prevalence of neonatal diseases including patent ductus arteriosus (PDA) requiring medication or surgery, BPD (oxygen requirement for ≥28 days plus treatment with b30% oxygen or CPAP at 36 weeks' PMA) [13], IVH assessed by cranial ultrasound, ROP examined by pedi…	differences in the rates of stage II–III ROP (p=0.007)	Growth parameters included enteral feeding at discharge (≥ or b400 c.c./day), occurrences of a feeding desaturation event (oxygen saturationb80%) within one week of discharge, average daily weight gains from birth to term age, and weight and normalized weight (z) at term age. For infants who were discharged before 40 weeks PMA,weight at term age was measured at the neonatal follow-up clinic.	feeding desaturation (p=0.05), and the daily weight gain (p=0.07) favouring the intervention group	Neurodevelopment was assessed by trained research assistants using the Neonatal Neurobehavioral Examination—Chinese version (NNE-C) [14], which consists of three sections: tone and motor patterns, primitive reflex and behavioral response. Each section contains nine items, and each item is scored on a three-point scale. The NNE-C has acceptable reliability and predictive validity when used with Ta…	No differences	Good	RCT of specific intervention well defined with clear outcomes
Chiabi et al 2013	Neonatology Unit of the Yaounde Gynaeco-Obstetric and Paediatric Hospital	Our target population was all preterm neonates (cases) admitted in the unit within the study period, however only those with sufficient legible data to establish prematurity and risk factors (533) were retained for the study	Not clear	7	Cameroon	7	4	Yes	To discharge	1894 premature infants	1	3	<37 weeks (Mean - 36 weeks)	Yes - mortality on discharge, "early neonatal mortality (0-7 days)" mentioned	67% of premature infants admitted died (not sure if this is a percentage of all deaths - not clear from write up)	No	N/A	No	N/A	No	N/A	Low	retrospective survey of just those infants admitted
Christian, P et al 2014	Rural south plains of Nepal - Nepal Nutrition Intervention Project	Children who had been given iron folic acid or zinc in the early period of life. These were all children of mums who were part of an RCT of micronutrient supplementation	Not clear	1	Nepal	5	2	Not clear	Average age 8.4 yrs	1927 premature infants eligible	1	3	<37 weeks - not clear	No	N/A	No	N/A	Anthropometry (weight, height and mid upper arm circumference)	Head circumference and SGA related to cognitive test results	General intelligence was assessed with the Universal Nonverbal Intelligence Test (UNIT) [13]. A (numbers) Stroop test [14], and backward digit span (Wechsler and Psychological Corporation. 1991) were utilized to assess inhibitory control and verbal working memory, components of executive functioning. The Movement Assessment Battery for Children (MABC) and a finger tapping test were administered t…	SGA was significantly (all p < 0.005) associated with lower UNIT scores (−2.04 SE = 0.39); higher proportion failure on Stroop test (0.06, SE = 0.02); and lower scores on the backward digit span test (−0.16, SE = 0.04), MABC (0.98, SE = 0.25), and finger tapping test (−0.66, SE = 0.22) after adjusting for confounders	Moderate	Prospective case cohort study with a number of confounders
De A et al 2013	Tertiary care hospital in Mumbai, India	neonatal sepsis cases, where Acinetobacter species were isolated from blood cultures	Immunocompromise	5	India	5	4	Not clear	Until discharge?	80 neonates	3	6	Not clear	Yes - ?until discharge	Prematurity not a significant risk factor to death	Yes	Risk of acetinobacter infection	No	N/A	No	N/A	Low	Retrospective survey of those infected with acinobacter
Demirel G et al 2013	Tertiary NICU in Ankara, Turkey	Preterm infants of gestational age ≤32 weeks and birth weight ≤1500 g who survived to start enteral feeding were enrolled in the study	Major congenital anomalies and lack of parental consent.	4	Turkey	4	1	Y (not clear)	Not clear	278 infants	4	6	<32 weeks (average 28 weeks)	Death at 7 days	Death equal in the two groups	Incidence of grade II NEC and culture proven sepsis	No differences between the two groups	No	N/A	No	N/A	Moderate	RCT of probiotic
Engmann et al 2012	Community setting Ghana - Navrongo Health Research Centre in the Kassena-Nankana District1 (KND) of the Upper East region. The KND covers a land area of 1685 km2 and has an estimated population of 150 000. The district has one major hospital that acts as a referral hospital to 5 health centres	all pregnancies, births and deaths that occur in their communities. All pregnancies are identified in the community by either the trained commu- nity key informants (CKIs) or during the 4-monthly visits by trained field workers. These pregnancies are then registered. It is during the time of registering the pregnancy that the last menstrual period is established	Moved out of study area	1	Ghana	5	2	Y	7 days	18,852 births (10.8% were less than 32 weeks and 22.3% were 32-36 weeks)	3	3	All (<36 weeks considered prem)	Perinatal mortality rate and early neonatal mortality (1st 7 days)	If <32 weeks PNMR was 186/1000 (OR 13.8 (11.5-16.38) or OR Gee ratio 2.84 (2.12-3.81), if 32-36 weeks then PNMR was 33.7 (OR 2.1 (1.69-2.60) or OR Gee ratio of 2.1 (1.69-2.60) and 1.29 (0.97-1.71) and if term was 16.4. Early neonatal mortality rate was 37.3/1000 for <32 weeks with an OR or 3.16 (2.35-4.22) and an OR Gee ration of 2.84 (2.11-3.81), for those <36 weeks the ENMR was 16.8 with an OR …	No	N/A	No	N/A	No	N/A	Good	Large population based study prospectively conducted
Eras et al 2013	Neonatal unit at teaching hospital in Ankara Turkey	Infants <32 weeks with PDA	Not clear	7	Turkey	7	1	Y	18 and 24 months	102 infants	3 (PDA and prem)	6	<32 weeks(27.5-28.2 weeks average)	No	N/A	Yes - RDS, NEC, Sepsis, Pneumothorax, IVH, CLD and ROP all measured in two groups	RDS in 20% of infants, NEC in one infant only, Sepsis in 76%, IVH in 7-20% (?sig??), CLD in 30% and ROP in 56-77%	No	N/A	Yes - physical exam, neurological exam, ophthalmological exam and audiology, BSID II MDI and PDI	No differences in MDI, PDI, rate of CP or sensory impairment	Moderate	RCT but on very small numbers so ?suff for study
Erdemir, A et al 2014	Tertiary neonatal unit in Izmir Turkey	<33 weeks and receiving mechanical vent	admission after 6 hours of age; those with congenital cardiac, respiratory, or CNS malformations; congenital metabolic diseases; congenital pneumonia; sepsis; perinatal asphyxia; and leak less than 20% around the endotracheal tube.	4	Turkey	4	1	Y	Morbidity criteria in hospital	60 preterm infants	1 (but with RDS)	6	<32 weeks but average was 28.2 weeks	Mortality prior to discharge	Mortality higher in SIMV group but not statistically sig	Yes - duration of hospitalisation, repeated synacthen, mean tiem in SIPPV, mean extubn time, post extubation atelectatsis, PDA, IVH, BPD, Pneumothx	mean peak inflation pressure was higher in synchronized intermittent mandatory ventilation group (p < 0.001) and the mean airway pressure was higher in pressure support ventilation with volume guarantee group (p = 0.03), whereas mean tidal volume and respiratory rates were similar in both groups. The prevalence of postextubation atelectasis was higher in synchronized intermittent mandatory ventil…	No	N/A	No	N/A	Moderate	RCT but quite small.
Fortes Filho J et al 2013	Tertiary neonatal unit in Southern Brazil	All preterm infants with birthweight <1000g	Those that died before ophthalmological examination	4	Brazil	4	3	Y	"during entire observational period"	157 infants	2	5	28.3 weeks (range 24– 32 weeks), respectively	No	N/A	the occurrence of surfactant, indomethacin, blood transfusions and erythropoietin therapies, occurrence of sepsis, meningitis, all stages of intraventricular hemorrhage (IVH) and persistent ductus arteriosus (PDA). Sepsis, meningitis and IVH were diagnosed by clinical examination, microbiological culture and cranial ultrasound, respectively. The diagnosis of clinical sepsis was based on the occur…	99 patients (63.1%) developed clinical sepsis, 91 pa- tients (58.0%) used oxygen therapy in mechanical ventilation, 89 patients (56.7%) received surfactant, 88 patients (56.1%) received erythropoietin, 49 pa- tients (31.2%) developed any stage of IVH (15 pa- tients with stages 3 or 4 of IVH) and 23 patients (14.6%) developed PDA. . Seventeen patients (10.8%) de- veloped stage 1 of ROP, and 21 pat…	patient’s weight measured at completion of sixth week of life	The mean weight of the entire cohort at completion of the sixth week of life was 1339.7279.14 g	No	N/A	Moderate	Prospective cohort study
Hadi et al 2013	3 hospitals in Alexandria, Egypt.	infants weighing , 1250 g and maternal postmenstrual age , 32 weeks if there was concern about prolonged exposure to oxygen	Not clear	4	Egypt	4	4	Not clear	Not clear	152 infants	3 (prem and at risk"	6	<32 weeks (Mean 31 weeks)	No	N/A	method of ventilation (nasal continuous airway pressure or intermittent mechanical ventilation), packed red blood cell and/or plasma transfusion, occurrence of sepsis, neonatal indirect hyperbilirubinemia, intraventricular hemorrhage, and patent ductus arteriosus	52 had ROP of any stage (34.4%), and 27 (18%) had stage 1, five (3.3%) had stage 2, 17 (11.5%) had stage 3, and three (1.6%) had stage 4 disease all risk factors studied were found to be significantly associated with the development of ROP, except for neonatal indirect hyperbilirubinemia. Severity of ROP was inversely proportional to birth weight and gestational age.	No	N/a	No	N/A	Low	Retrospective analysis
Krishnamurthy et al 2013	Tertiary care centre in Pondicherry, India	<37 weeks gestational age) VLBW infants (birth weight 1000–1500 g) who reached full enteral feeds of 180 mL/kg/day by 2 weeks postnatal age were included in the study	Babies with major congenital anomalies, multiple gestation and Rh or ABO haemolytic disease were excluded	7	India	7	1	N	12 weeks postnatal age	104 infants	1 (and other inclusion criteria)	6	<37 weeks (34 weeks gestation was average)	No	N/A	serum ferritin, ROP (indirect ophthalmoscopy), NEC (modified Bell's criteria), PVL (USS deVries classification), sepsis (clinical signs of infection and either a positive blood culture result or hs-CRP level >10 mg/L), Hb levels and incidence of transfusion	Serum ferritin level was significantly higher (p<0.001) at 12 weeks (82±5 vs 63±3 ng/mL) in the EI group. Haemoglobin (10.1±0.4 vs 9.2±0.4 g/dL) and mean corpuscular haemoglobin concentration (31±0.5 vs 29.4±0.5 g/dL) were also significantly (p<0.001) higher at 12 weeks in the EI group. There was a significant decrease of ferritin in the LI group and significant increase in ferritin in the EI gro…	"Anthropometric parameters"	Same at end of study	Neurological assessment (Hammersmith neurological assessment)	No differences at end of study	Good	RCT of use of ferritin supplementation
Karagol, BS et al 2013	NICU in Ankara, Turkey	Preterm infants (750–1250 g and <32 weeks), inborn or trans- ferred to the NICU of Dr Sami Ulus Maternity, Children’s Education and Research Hospital, within the first 2 days of life (DOL) were eligible	(a) major congenital cardiac or other system-specific malformations; (b) respiratory distress, including respiratory rate >60 per minute at the time of initia- tion of feeding; (c) required arterial umbilical catheterization at the time of enrolment into the study; (d) severe perinatal depression (Apgar score <3 at 1 minute); (e) hypotension requiring inotropic agents to maintain blood pressure a…	4	Turkey	4	1	N	Until full feeds met	124 neonates	1	6	Mean gest age 28 weeks	Mortality to discharge	No significant differences in the groups 4 in one group (9%) and 3 (7%) in another group	hours of life enteral feeds were started, DOL that parenteral nutrition (PN) was started, total days of PN administra- tion, DOL to 80 mL/kg/d enteral feeds, NEC (Bell’s stage 2 or greater)12 and culture-proven late-onset sepsis, defined as the association of clinical signs and positive cultures obtained from blood, cerebrospinal fluid, and urine (at ≥3 days of age). Other clinical outcomes exami…	Neonates in the rapid-feeding advancement group achieved full enteral volume of feedings earlier than the slower advancement group. They received significantly fewer days of PN, incidence of NEC and the number of episodes of feed intolerance were not significantly different (Table 2). The inci- dence of culture-proven late-onset sepsis was significantly less in infants receiving rapid-feeding adv…	weight, height, head circumference	Rapid feeding group regained birth weight quicker. rates of extrauterine growth restriction or weight less than the 10th percentile for gestational age on the Fenton curve11 were significantly reduced in the rapid- feeding advancement group at 28 days of age (26% vs 38%, P = .03) and at hospital discharge (17% vs 31%, P = .02)	No	N/A	High	RCT of use of TPN
Koum, D et al 2014		hospi- talized newborns were recorded from November 2009 to May 2012.	Not clear	3	Cameroon	3	4	Y	Until discharge	813 neonates	3 (all neonates)	6	All neonates	Mortality during admission	15.3% deaths in prem neonates (3,3 (2,0–5,6))	Not specific	N/a	No	N/A	No	N/A	Low	Retrospective case review
Lakshmi, C. et al 2013	Referral Perinatal centre in India	very low birth weight (VLBW) infants (<1500 gm birth weight) and gestation <35 weeks born consecutively between the periods January 2007 to December 2008 at our referral perinatal center were prospectively approached for informed consent for enrolment at admission into the NICU	Congenital malformations	7	India	7	3	Y	18 months of age	238 infants	4	4	<37 weeks but mean of 31 weeks	Hospital deaths	12 with absent or reduced diastolic flow died vs 1 of others. after adjusting for ELBW (birth weight<1000g) and IUGR status, AREDF continued to have an independent association with neonatal mortality (OR 9.8, 95% CI 2.1- 46.4) and RDS (OR 2.4, 95% CI,1.1-5.0).	RDS, resp support, PDA, jaundice, CLD, ROP	Increased risk of RDS and resp support in ARDEF	Growth was evaluated by measuring the weight, head circumference and length by a trained nurse and plotted on the Indian Academy of Pediatrics growth charts	There were also no differences between the groups in the incidence of microcephaly, short stature or poor weight gain.	Neurological assessment was done by experienced physicians using the Amiel-Tison method, BSEAs also done at 40 weeks	combined outcome of death or cerebral palsy (n=18,17% vs n=4, 3%, OR 5.9, 95% CI 1.9 to 25) was 5.9 times higher in the AREDF group compared to the FEDF. Also AREDF infants showed a trend toward higher risk for developing cerebral palsy compared to the FEDF infants (n=6,7% vs n=1,1%: P=0.06). None of the infants in either group were blind or had deafness. independent association with the composit…	Moderate	Cohort study with no comparison but strong stats
Lavanya, K. R. et al 2012	Urban perinatal centre, Hyderabad, India	All consecutive inborn late preterm infants between 1st February to 31st July, 2009 with post-menstrual age of 34 0/7 to 36 6/7 weeks were eligible for inclusion	Infants with major malformations and Rh incompatibility were excluded	2	India	7	3	Not clear	14 days of life or onset of jaundice	216 infants enrolled	1	5	34- 36+6 weeks	No	N/A	Transcutaneous bilirubin (TcB) was measured in each infant twice daily for the first 48 hours of life. Significant jaundice was defined as requirement of phototherapy/exchange.	36% of the jaundiced infants had TSB greater than 15 mg/dL. The mean duration of onset of significant jaundice was 61 ± 32 hours. The mean duration of phototherapy was 49 ± 26 hours. Large for gestation, lower gestational age, birth trauma and previous sibling with jaundice predicted severe jaundice. TcB measured at 24-48 hrs was a better predictor of ‘significant jaundice with onset after 48 hrs…	No	N/A	No	N/A	Moderate	Cohort study well defined.
Leadford, A. E. et al 2013	University teaching hospital in Lusaka, Zambia	Infants at 26 to 36 weeks’ gestational age and/or with a birth weight of 1000 to 2500 g born at the University Teaching Hospital	Infants were excluded if they had an abdominal wall defect, myelomeningocele, other major congenital anomaly, or obvious skin disorders.	2	Zambia	4	1	Not clear	1 hour after birth	104 infants	4	5	26-36 weeks	Mortality prior to discharge	No differences	hypotension, hypoglycemia, seizures during the first 24 hours after birth, respiratory distress syndrome, bronchopulmonary dysplasia, pneumothorax, sepsis, major brain injury (defined as intraventricular hemorrhage Grade 3 or 4 or periventricular leukomalacia), necrotizing enterocolitis, bowel perforation, pulmonary hemorrhage	Of the 49 infants in the intervention (plastic bag) group,29 (59%)compared with 18 (33%) of 55 infants in the control group had a temperature in the normal range at 1 hour after birth (relative risk 1.81 with 95% confidence interval 1.16– 2.81, P = .007). The mean temperature at 1 hour for infants in the intervention group was 36.560.5oC compared with 36.1 6 0.6oC in control infants (P , .001). T…	No	N/A	No	N/A	Good	RCT of plastic bag use to prevent hypothermia.
Ma X et al 2013	NICU, Bayi Childrens Hospital, Beijing	Premature infants following hydrocephalus from IVH less than 32 weeks		7	China	4	3	Not clear	12-18 mo after operation	20 infants	3 (IVH and prem)	6	<32 weeks	No	N/A	Yes - hydrocephalus and duration, VP shunt, ventriculostomy, ventricular size, secondary IVH	Hydrocephalus relieved in some with shunts put in - some still improved at 3 mo and some not.	No	N/A	No	N/A	Low	Case series
McDonald CM et al 2012	8 antenatal clinics in Dar Es Salaam	WomenX18 years who tested HIV-positive at the 32nd week of gestation or earlier in one of eight antenatal clinics in Dar es Salaam, Tanzania were invited to participate. Eligibility for infant participation in the trial included: (1) singleton birth and; and (2) 5–7 weeks of age at randomization	Congenital malformations and other disorders which might interfere	1	Tanzania	5	1	N	24 months	2387 infants	3 (infants of HIV positive mums)	6	All infants. Not clear of average	No	N.a	Yes - morbidity assessment, which was supported by a pictorial diary that mothers were asked to complete at home to record when their child had certain symptoms. Diarrhoea was defined as the presence of three or more loose or watery stools in the prior 24 h. Body temperature, measured using a digital thermometer to the nearest 0.1 1C, and respiratory rate, measured for 1 min using a stopwatch, we…	N/a	Yes - OFC, stunting, wasting	HR (risk of stunting on uni variate analysis was 1.26 (1.02, 1.56), HR risk of wasting 1.37 (1.13, 1.67) on univariate analysis and 1.28 (1.05, 1.57) on multivariate analysis and underweight 1.42 (1.15, 1.75) for univariate and 1.30 (1.05, 1.61) for multivariate.	No	N/A	Good	RCT of HIV mothers in the community.
Mihajlovic, M et al 2013.	Neonatology unit of Belgrade Serbia	IVH and hydrocephalus - at least 23 weeks of age, IVH was documented by ultrasound, bilateral ventricular dilatation was 4 mm or more	values of prothrombin time over 20 seconds or if the thrombocytes level was less than 50000/mm3.	4	Serbia	4	1	Not clear	Unclear	60 infants	3	6	Average gest 29 weeks	Yes - survival to discharge	No differences in death rates between the groups	Yes - poor treatment outcome	Poor treatment outcome affected by low birth weight (t=2.560, p=0.016), low Apgar scores (t=3.059, p=0.005), an ex- tended number of days on assisted ventilation (Z=4.404, p <0.001), presence of peripartum asphyxia (χ2 p=0.002) and cardio-respiratory arrest (χ2 =9.977, =12.804, p<0.001).	No	N/A	No	N/a	Low	Not clear how groups were created or patients chosen for groups etc.
Oncel, M et al 2014	Tertiary neonatal intensive care unit, Ankara	Preterm infants with a gestational age of ≤32 weeks and a birth weight of ≤1500 g were included (n=400)	major congenital mal- formations and lack of parental consent	4	Turkey	4	1	Not clear	Hospital stay	424 infants	1	6	Average of 28 weeks	Yes - 7 days "Death beyond the 7th day of life"	No differences between groups	NEC, NEC stage ≥2. Secondary outcomes were culture-proven sepsis, feeding intolerance, time to reach full enteral feeding and duration of hospitalisation. Adverse effects, including culture-proven sepsis attributable to L reuteri, flatulence and diarrhoea were also recorded.	frequency of culture-proven sepsis was significantly lower in probiotic group when compared to placebo group (RR 2.05; 95% CI 1.01 to 4.14; p=0.041), Feeding intolerance was significantly lower in infants exposed to probiotic when compared to placebo-exposed infants (28% vs 39.5%; p=0.015). Feeding intolerance periods of the infants in both groups were less than 72 h, and only 16 (8%) infants in …	No	N.A	No	N/A	Good	Good well delineated RCT
Ruiz-Peláez, J. G et al 2014	12 NIUS in Bogota	Preterms <34 weeks	No congenital malformations	4	Colombia	4	3	Not clear	28 days or 56 days depending on gestation	496 infants	1	6	Average of 31 weeks	Yes - death at 28 days	Neonatatal mortality was 80 out of 496	BPD - mild or mod to sever.	54.3% had BPD	No	N/A	No	N/A	Moderate	Prospective cohort study
Rylance, S et al 2013	Neonatal unit Queens Hospital Blantyre Malawi	All infants admitted over a 6 month period <1500g	Not mentioned	3	Malawi	3	4	Y	Not clear	1839 admissions	2	1	All births - classified as <32 weeks or >32 weeks	Survival to discharge	19 % of those <32 weeks survived to discharge	No	N/A	No	N/A	No	N/A	Low	Retrospective audit.
Saleem, A. F et al 2013	NICU at Aga Khan University Hospital, Pakistan	neonates with a discharge diagnosis of sepsis due to late-onset K. pneumoniae	Not clear	4	Pakistan	4	4	Y	Until discharge	104 neonates	3	6	Mean gest age of 30 weeks	Yes - death in hospital	65% of neonates who died were premature. Gest age was a risk factor for death OR 0.7 (0.6–0.9) p 0.02	No	N/A	No	N.A	No	N/A	Low	Retrospective cohort
Satar, M et al 2014	NICU of the Çukurova University Balcalı Hospital, Adana,	Premature infants who underwent ROP screening	Not clear	4	Turkey	4	4	Not clear	Not clear - ?only until time of screening	97 infants	3	5	Mean gest age 30 weeks	No	N/A	stage of ROP was also diagnosed according to the International Classification of Retinopathy of Prematurity (ICROP). ROP was graded according to the classification system developed by the International Committee for the Classification of ROP. duration of mechanical ventilation, duration of oxygen therapy, intraventricular/ periventricular hemorrhage (IVH/PVH), prenatal steroid therapy, surfactant…	Gestational week was significantly lower in ROP (+) patients in the 2nd period (p<0.01)	No	N/A	No	N/A	Low	Retrospective case review
Serce, O et al 2014.	NICU, Istanbul, Turkey	VLBW infants (gestational age ≤32 weeks; birth weight ≤1500 g) who survived to feed enterally were eligible for the trial	Infants who had severe asphyxia (stage III), major congenital anomalies, those who had been fasted for more than 3 weeks, died in the first postnatal 14 days and infants who used antifungal therapy were excluded.	4	Turkey	4	1	Not clear	Until discharge	244 infants	4	5	Mean gest age 28.8 weeks	Death prior to discharge	No differences in the two groups.	“Modified Bell Classification” was used to define NEC [11],and “Papille Classification” for IVH, culture proven late onset sepsis = two clinical signs (as listed in paper) and culture positive at 48 hours. time to reach 100 mL/kg/day of enteral feeding, weight gain per week, oxygen dependency at 36 weeks, duration of hospitalization	No difference between groups	No	N/A	No	N/A	Good	Well set out clinical trial with clear definitions.
Seth, B et al 2014	Neonatal unit in Northern India	<34 weeks gestation	Newborns with significant morbidities likely to affect the clinical course (major malformations, suspected genetic/metabolic defects, risk factors for sepsis, gestational age < 28 weeks, intrapartum trauma or exposure to opioids or magnesium sulphate) were excluded.	7	India	7	2	Not cler	Until 34 weeks GA	100 enrolled but 76 followed up	1	5	Ave 31 weeks	Death at 34 weeks - 5 died	5 died	neonatal (morbidities, required interventions and outcome) details				the score for motor development and vigour (MDV) and alertness and orientation (AO) domains of neurobehavior were assessed by NAPI at 34 completed weeks of PCA	Statistically different mean MDV scores between those with low pH and those with normal pH.	Low	Prospective cohort study but with poor follow up .
Slyker et al 2014	Antenatal clinics in Nairobi, Kenya	HIV-infected women with gestation ≥28 weeks were recruited from Nairobi antenatal clinics from 1999-2002	Twins excluded	1	Kenya	5	2	N	1 year	468 singleton deliveries	3	5	Mean gestation was 35 weeks.	Neonatal and infant mortality were defined as deaths occurring within the first 28 days, and 365 days of life, respectively	neonatal mortality. When adjusting for maternal plasma HIV-1 RNA load at 32 weeks gestation, PTB (hazard ratio (HR) = 2.7, p = 0.05), LBW (HR = 3.3, p = 0.03) and SGA (HR = 2.9, p = 0.04) remained independently associated with time to infant death incidence rate (IR) for infants born PTB was 7-fold higher than infants born at term (IR = 5.8 vs 0.81 per 1000 person-days, incidence rate ratio (IRR)…	No	M/A	No	N./A	No	N/A	Good	Case cohort study from the community
Stein, A. D et al 2013	Variable - 5 areas (community studies)	Cohort studies in area	Variable	1	Brazil, India, Philippines, South Africa, Guatemala	5	3	Not clear	15 years	4518 participants	3	3	Not clear <37 weeks	No	N/A	Yes - BP in adulthood, fasting blood samples	No differences seen.	Yes - height and weight, HAZ and BMI	Adults born preterm were 1.11 cm shorter (95% CI, 0.57-1.65 cm), and those born term but SGA were 2.35cm shorter (95%CI, 1.93-2.77 cm) compared with those born at term and appropriate size for gestational age	Yes - highest grade of schooling completed - Schooling was classified as completion of secondary school (based on site-specific criteria: completion of 12th grade in Brazil, India, and South Africa; 11th grade in Guatemala; and 10th grade in the Philippines) or not	Compared with those born term and at appropriate size for gestational age, schooling attainment was 0.44 years lower (95% CI, 0.17-0.71 years) in those born pretermand0.41 years lower(95%CI, 0.20-0.62years) in those born term but SGA	Good	Large prospective cohort study
Stephenson, B et al 2013	Pediatric Department, Kerala, India	High risk infants discharged from NICU - Low birth weight infants who required NICU admission, Preterms, Blood culture proved Neonatal sepsis , Neonatal meningitis, Neonatal seizures, Meconium aspiration Syndrome, Hyaline membrane disease, Neonatal hypoglycaemia, Intraventricular haemorrhage and Severe birth asphyxia	Major congenital malformations	3	India	3	3	Not clear	12 months	69 infants	3	6	Not clear	No	N/A	RDS, IVH, sepsis, meconium aspiration, asphyxia, hypoglycaemia, NEC	Not clear	Yes-OFC, height and weight	Preterm babies gained weight and head circumference quicker than term infants	Yes - Trivandum developmental screening chart, Developmental Scale for Assessment of Indian Infants II, Amiel Tison assessment of tone.	No differences statistically	Low	Prospective study
Welaga, P. et al 2013	Navrongo Health Research Centre Demographic Health System Data	Pregnant women whose pregnancies were monitored until completion	Pregnancies not monitored to completion	1	Ghana	5	2	Y	1 month	17751 live births	3	3	all but broken up into <32, 32-36, >36	Yes - ENMR, NMR (Verbal autopsy used)	NMR 24/1000 (22-26), ENMR - 16/1000 (14-17). Prem NMR 18/1000 in 2003 and 2/1000 in 2009, OR of death <32 weeks (3.39 (2.66-4.32) Adj OR 3.10 (2.43 - 3.96), <36 weeks - 1.2 (0.95-1.54) OR and Adj OR of 1.1 (0.87-1.42)	No	N/A	No	N/A	No	N/A	Good	Large prospective cohort study
Xia, H. et al 2014	11 NICUs in China during 2009-2011 - 4 provinces - Northern, Southern, local, coastal inborn and infants transferred included	Infants found retrospectively with positive body fluid with growth of candidiasis (peritoneal, blood, urine)	Not clear	7	China	7	4	Y	Until discharge	223 patients	3	6	All but average 31.4 weeks	Mortality to discharge.	19.3% of infants	Not really but intracranial abscess, endopthalmitis, length of hospital stay, length of antifungal treatment.	N/A	No	N/A	No	N/A	Low	Retrospective case note review
